# Supplementary material for: Impacts of early smoking initiation: long-term trends of lung cancer mortality and smoking initiation from repeated cross-sectional surveys in Great Britain
Source: PubMed Central journal article supplement — BMJ Open. 2012 Oct 9;2(5):e001676. doi: 10.1136/bmjopen-2012-001676 (PMC3488725; doi:10.1136/bmjopen-2012-001676), 2012-10-09
Supplement: bmjopen-2012-001676.draft_revisions.pdf [file bmjopen-2012-001676.draft_revisions.pdf]

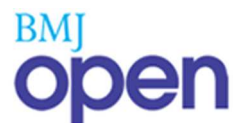

**Impacts of early smoking initiation: long-term trends of lung cancer mortality and smoking initiation from repeated cross-sectional surveys in Great Britain**

|                                 |                                                                                                                                                                                                                                                                                                  |
|---------------------------------|--------------------------------------------------------------------------------------------------------------------------------------------------------------------------------------------------------------------------------------------------------------------------------------------------|
| Journal:                        | <i>BMJ Open</i>                                                                                                                                                                                                                                                                                  |
| Manuscript ID:                  | bmjopen-2012-001676                                                                                                                                                                                                                                                                              |
| Article Type:                   | Research                                                                                                                                                                                                                                                                                         |
| Date Submitted by the Author:   | 15-Jun-2012                                                                                                                                                                                                                                                                                      |
| Complete List of Authors:       | Funatogawa, Ikuko; Teikyo University Graduate School of Public Health, Department of Public Health<br>Funatogawa, Takashi; Chugai Pharmaceutical Co., Ltd., Clinical research planning department<br>Yano, Eiji; Teikyo University Graduate School of Public Health, Department of Public Health |
| <b>Primary Subject Heading</b>: | Smoking and tobacco                                                                                                                                                                                                                                                                              |
| Secondary Subject Heading:      | Public health, Epidemiology, Oncology                                                                                                                                                                                                                                                            |
| Keywords:                       | PUBLIC HEALTH, Epidemiology < ONCOLOGY, PREVENTIVE MEDICINE, STATISTICS & RESEARCH METHODS                                                                                                                                                                                                       |
|                                 |                                                                                                                                                                                                                                                                                                  |

SCHOLARONE™  
Manuscripts

1  
2  
3  
4  
5  
6 **Impacts of early smoking initiation: long-term trends of lung cancer mortality and**  
7  
8  
9 **smoking initiation from repeated cross-sectional surveys in Great Britain**  
10  
11  
12  
13

14  
15 Ikuko Funatogawa, Takashi Funatogawa *statistician*, Eiji Yano

16  
17 Teikyo University Graduate School of Public Health, 2-11-1 Kaga, Itabashi-ku, Tokyo

18  
19  
20 173-8605, Japan Ikuko Funatogawa *associate professor* Chugai Pharmaceutical Co.,

21  
22  
23 Ltd., 2-1-1 Nihonbashi Muromachi, Chuo-ku, Tokyo, 103-8324, Japan Takashi

24  
25  
26 Funatogawa *statistician* Teikyo University Graduate School of Public Health, 2-11-1

27  
28  
29 Kaga, Itabashi-ku, Tokyo 173-8605, Japan Ikuko Funatogawa *professor*

30  
31  
32 Correspondance to: I Funatogawa, Teikyo University Graduate School of Public Health,

33  
34  
35 2-11-1 Kaga, Itabashi-ku, Tokyo 173-8605, Japan ifunatogawa-tky@umin.ac.jp, Tel:

36  
37  
38 +81 3-3964-1211, Fax: +81 3-3964-1058,

39  
40  
41 Running title: Impacts of early smoking initiation

42  
43  
44  
45  
46 Words count for the abstract: 271

47  
48  
49 Words count for the text: 2415

50  
51  
52 The number of figures: 3

53  
54  
55 The number of tables: 1

**ABSTRACT**

**Objective** To show long-term trends of smoking initiation in Great Britain including unanalyzed data and assess the impact of early smoking initiation on the lung cancer mortality in later ages focusing on birth cohorts.

**Design** Reanalysis of repeated cross-sectional surveys conducted thirteen times during 1965–1987.

**Setting** Great Britain.

**Participants** Men and women aged 16 years and over in each survey.

**Primary outcome measures** Smoking initiation for 1898–1969 birth cohorts and lung cancer mortality in 1950–2009.

**Results** In men, 1900–1925 birth cohorts showed high smoking initiation (>32%, >50%, and >80% at 15, 17, and 29 years old, respectively). Correspondingly, the lung cancer mortality in these cohorts exceeded 1 per 1000 at a young age (50–54 years old). In women, smoking initiation increased clearly from the 1898 cohort to the 1925 cohort (2% to 12%, 4% to 24%, and 13% to 54% at 15, 17, and 29 years old, respectively). Correspondingly, the age at which the mortality exceeded 1 per 1000 became younger (75–79 to 60–64 years old). In both men and women, short-term decreases in initiation were seen from the late-1920s cohorts. Correspondingly, lung cancer mortality

1  
2  
3  
4  
5  
6 decreased. In women, initiation increased again after the mid-1930s cohorts, and  
7  
8 mortality increased after they became 60–64 years old.  
9

10  
11 **Conclusions** Clear relationships between smoking initiation and lung cancer mortality  
12  
13 across birth cohorts were observed. Countries with rapid increases in initiation in teens  
14  
15 should not underestimate the risk in the distant future. Because of the long time lags  
16  
17 within cohorts compared with rapid changes in smoking habits across cohorts,  
18  
19 age-specific measures focusing on birth cohorts should be monitored.  
20  
21  
22  
23  
24

25  
26  
27  
28  
29 **Key words:** Birth cohort; cross-sectional study; Great Britain; lung cancer mortality;  
30  
31 smoking; smoking initiation; tobacco  
32  
33  
34  
35  
36  
37

38 **Article focus:**

- 39  
40  
41 • Starting to smoke before 15 years of age greatly increased mortality from lung  
42  
43 cancer and other diseases in cohort studies.  
44  
45  
46  
47 • Available data concerning smoking initiation and subsequent lung cancer mortality  
48  
49 in later age by birth cohort are limited in most countries.  
50  
51

52  
53  
54  
55 **Key messages:**  
56  
57  
58  
59  
60

- The male birth cohorts with high smoking initiation in their teens had high lung cancer mortality, and clear increases in smoking initiation among female cohorts corresponded to the increases in lung cancer mortality.
- Short-term decreases in smoking initiation seen from the late-1920s cohorts corresponded to the decreases in lung cancer mortality.
- In women, smoking initiation increased after the mid-1930s cohorts, and their lung cancer mortality increased after 60–64 years of age, suggesting a long time lag.

**Strength and limitations of this study:**

- The survey from 1965 in Great Britain provides some of the oldest data about smoking initiation, and the repeated survey about initiation and mortality data in enough scale population provide stable estimates in this study.
- The cumulative initiation in this study was based on retrospective questionnaires, and initiation may be underestimated in the elderly.

## Introduction

Smoking causes many adverse health effects including lung cancer, cardiovascular diseases, and respiratory diseases.<sup>1</sup> Despite its known harmful health effects, almost one billion men and 250 million women in the world smoke.<sup>2</sup> The tobacco epidemic has shifted to developing countries.<sup>1</sup> Furthermore, some countries have experienced a rapid increase in smoking initiation among teens.<sup>3</sup> Because there are long time lags between smoking initiation and smoking-attributed mortalities which become apparent only in mid-to-late adulthood, the impacts of early smoking initiation tend to be unclear.

For global public health, it is important to know smoking and subsequent mortality data in several birth cohorts with various smoking habits. However, available data are limited, especially about smoking initiation. In Great Britain, the age of smoking initiation was frequently surveyed between 1965 and 1987,<sup>4</sup> but birth cohorts were not specified. In this paper, we quantitatively estimated long-term trends of smoking initiation and showed the relationship to the lung cancer mortality focusing on birth cohorts.

## Methods

We estimated cumulative smoking initiation by birth cohort. We showed changes with

1  
2  
3  
4  
5  
6 age in the cumulative smoking initiation, smoking prevalence, and lung cancer mortality  
7  
8  
9 for the 1905, 1925, and 1945 birth cohorts; mortality in later ages has been already  
10  
11  
12 observed up until the 1925 cohort. We also showed changes with birth year in the three  
13  
14  
15 indicators at specified ages.  
16  
17  
18  
19

### 20 **Smoking Initiation**

21  
22 From 1948 to 1987, the Tobacco Advisory Council conducted an annual survey on  
23  
24 smoking habits in Great Britain (England, Wales, and Scotland).<sup>4</sup> Most of these surveys  
25  
26 interviewed about 10 000 people. The age of initiation was reported from the thirteen  
27  
28 surveys conducted in 1965, 1968, 1971, 1973, 1975, 1978, and annually during  
29  
30 1981–1987 as percentages of people who started smoking any tobacco by sex and age  
31  
32 group at the time of survey. Age of initiation was categorized as <14 (1975–1987),  
33  
34 14–15 (1975–1987), <16 (1965–1973), 16–17, 18–19, 20–24, 25–29, >29, ‘Don’t  
35  
36 know,’ and ‘Never smoked for as long as a year’ (1965–1987). The percentages of  
37  
38 ‘Don’t know’ were <5% in women, <6% in men aged <35 years, and <11% in older  
39  
40 men, and we excluded this category in the analysis. For initiation data, age at the time of  
41  
42 survey was categorized as 16–19 (1965–1987), 20–24 (1965–1987), 25–34 (1965–1975),  
43  
44 25–29 (1975–1987), 30–34 (1981–1987), 35–59 (1965–1975), 35–49 (1981–1987),  
45  
46 50–64 (1981–1987), >59 (1965–1975), and >64 (1981–1987). We defined the birth year  
47  
48  
49  
50  
51  
52  
53  
54  
55  
56  
57  
58  
59  
60

1  
2  
3  
4  
5  
6 using the median age or next larger integer; thus, people aged 16–19 years in 1948 were  
7  
8  
9 defined as the 1930 birth cohort (1948 minus 18). For the categories >59 and >64, the  
10  
11 median age was estimated from population statistics.<sup>5</sup> We excluded the data for 35–59  
12  
13 years of age because the range was too wide. We calculated the cumulative proportion  
14  
15 of people who began smoking by specified ages. Then, for each birth cohort, except  
16  
17 cohorts that had no observations, we estimated cumulative initiation by taking an  
18  
19 average of the data from the birth cohorts within two years. In the age categories of >59  
20  
21 or >64, cumulative initiation and birth years were estimated by taking an average of  
22  
23 data for the periods of 1965–1968, 1971–1975, and 1981–1987. These cover the  
24  
25 1898–1969 cohorts.  
26  
27  
28  
29  
30  
31  
32  
33  
34  
35  
36  
37

### 38 **Smoking Prevalence**

39  
40 To show changes in prevalence with age for the 1905, 1925, and 1945 birth cohorts, we  
41  
42 used data from the 1984–1985 Health and Lifestyle Study in Great Britain.<sup>6</sup> Based on  
43  
44 the questions about the age of starting and quitting smoking, prevalence by birth cohort  
45  
46 and calendar year were reported.<sup>6</sup> The sample sizes by birth cohort and sex ranged from  
47  
48 214 to 993. We defined the 1900–1909 birth cohorts in 1930 as the 1905 birth cohort  
49  
50 and as 25 years of age.  
51  
52  
53  
54  
55  
56  
57  
58  
59  
60



1  
2  
3  
4  
5  
6 To show changes in age-specific prevalence with birth year, we used data from the  
7  
8  
9 annual survey of the Tobacco Advisory Council in 1948–1975 and the General  
10  
11 Household Survey in 1972–2005 conducted in Great Britain.<sup>7 8</sup> Most of the surveys of  
12  
13  
14 the Tobacco Advisory Council interviewed about 10 000 people, and the General  
15  
16 Household Survey interviewed 12 000 households or more. We used prevalence  
17  
18 reported annually for 16–19 and 20–24 year olds in 1948–1975, and 50–59 year olds for  
19  
20  
21 18 years during 1972–2005. We used prevalence of all tobacco products except women  
22  
23  
24 in the survey of the Tobacco Advisory Council. For them, we used prevalence of  
25  
26 manufactured cigarettes, as few women smoked products other than cigarettes and the  
27  
28 prevalence of all tobacco products were not reported for several years. The prevalence  
29  
30 included occasional smokers. In the same manner as the smoking initiation, we defined  
31  
32 birth year and estimated the average prevalence. These surveys cover the 1917–1987  
33  
34 cohorts. The smoking prevalence in 50–59 year olds for the 1945 cohort was also used  
35  
36  
37  
38  
39  
40  
41  
42  
43  
44 to show changes with age.  
45  
46  
47  
48

### 49 **Lung cancer mortality**

50  
51  
52 We calculated annual lung cancer mortality rates between 1950 and 2009 in Great  
53  
54  
55  
56  
57  
58  
59  
60  
61  
62  
63  
64  
65  
66  
67  
68  
69  
70  
71  
72  
73  
74  
75  
76  
77  
78  
79  
80  
81  
82  
83  
84  
85  
86  
87  
88  
89  
90  
91  
92  
93  
94  
95  
96  
97  
98  
99  
100  
101  
102  
103  
104  
105  
106  
107  
108  
109  
110  
111  
112  
113  
114  
115  
116  
117  
118  
119  
120  
121  
122  
123  
124  
125  
126  
127  
128  
129  
130  
131  
132  
133  
134  
135  
136  
137  
138  
139  
140  
141  
142  
143  
144  
145  
146  
147  
148  
149  
150  
151  
152  
153  
154  
155  
156  
157  
158  
159  
160  
161  
162  
163  
164  
165  
166  
167  
168  
169  
170  
171  
172  
173  
174  
175  
176  
177  
178  
179  
180  
181  
182  
183  
184  
185  
186  
187  
188  
189  
190  
191  
192  
193  
194  
195  
196  
197  
198  
199  
200  
201  
202  
203  
204  
205  
206  
207  
208  
209  
210  
211  
212  
213  
214  
215  
216  
217  
218  
219  
220  
221  
222  
223  
224  
225  
226  
227  
228  
229  
230  
231  
232  
233  
234  
235  
236  
237  
238  
239  
240  
241  
242  
243  
244  
245  
246  
247  
248  
249  
250  
251  
252  
253  
254  
255  
256  
257  
258  
259  
260  
261  
262  
263  
264  
265  
266  
267  
268  
269  
270  
271  
272  
273  
274  
275  
276  
277  
278  
279  
280  
281  
282  
283  
284  
285  
286  
287  
288  
289  
290  
291  
292  
293  
294  
295  
296  
297  
298  
299  
300  
301  
302  
303  
304  
305  
306  
307  
308  
309  
310  
311  
312  
313  
314  
315  
316  
317  
318  
319  
320  
321  
322  
323  
324  
325  
326  
327  
328  
329  
330  
331  
332  
333  
334  
335  
336  
337  
338  
339  
340  
341  
342  
343  
344  
345  
346  
347  
348  
349  
350  
351  
352  
353  
354  
355  
356  
357  
358  
359  
360  
361  
362  
363  
364  
365  
366  
367  
368  
369  
370  
371  
372  
373  
374  
375  
376  
377  
378  
379  
380  
381  
382  
383  
384  
385  
386  
387  
388  
389  
390  
391  
392  
393  
394  
395  
396  
397  
398  
399  
400  
401  
402  
403  
404  
405  
406  
407  
408  
409  
410  
411  
412  
413  
414  
415  
416  
417  
418  
419  
420  
421  
422  
423  
424  
425  
426  
427  
428  
429  
430  
431  
432  
433  
434  
435  
436  
437  
438  
439  
440  
441  
442  
443  
444  
445  
446  
447  
448  
449  
450  
451  
452  
453  
454  
455  
456  
457  
458  
459  
460  
461  
462  
463  
464  
465  
466  
467  
468  
469  
470  
471  
472  
473  
474  
475  
476  
477  
478  
479  
480  
481  
482  
483  
484  
485  
486  
487  
488  
489  
490  
491  
492  
493  
494  
495  
496  
497  
498  
499  
500  
501  
502  
503  
504  
505  
506  
507  
508  
509  
510  
511  
512  
513  
514  
515  
516  
517  
518  
519  
520  
521  
522  
523  
524  
525  
526  
527  
528  
529  
530  
531  
532  
533  
534  
535  
536  
537  
538  
539  
540  
541  
542  
543  
544  
545  
546  
547  
548  
549  
550  
551  
552  
553  
554  
555  
556  
557  
558  
559  
560  
561  
562  
563  
564  
565  
566  
567  
568  
569  
570  
571  
572  
573  
574  
575  
576  
577  
578  
579  
580  
581  
582  
583  
584  
585  
586  
587  
588  
589  
590  
591  
592  
593  
594  
595  
596  
597  
598  
599  
600  
601  
602  
603  
604  
605  
606  
607  
608  
609  
610  
611  
612  
613  
614  
615  
616  
617  
618  
619  
620  
621  
622  
623  
624  
625  
626  
627  
628  
629  
630  
631  
632  
633  
634  
635  
636  
637  
638  
639  
640  
641  
642  
643  
644  
645  
646  
647  
648  
649  
650  
651  
652  
653  
654  
655  
656  
657  
658  
659  
660  
661  
662  
663  
664  
665  
666  
667  
668  
669  
670  
671  
672  
673  
674  
675  
676  
677  
678  
679  
680  
681  
682  
683  
684  
685  
686  
687  
688  
689  
690  
691  
692  
693  
694  
695  
696  
697  
698  
699  
700  
701  
702  
703  
704  
705  
706  
707  
708  
709  
710  
711  
712  
713  
714  
715  
716  
717  
718  
719  
720  
721  
722  
723  
724  
725  
726  
727  
728  
729  
730  
731  
732  
733  
734  
735  
736  
737  
738  
739  
740  
741  
742  
743  
744  
745  
746  
747  
748  
749  
750  
751  
752  
753  
754  
755  
756  
757  
758  
759  
760  
761  
762  
763  
764  
765  
766  
767  
768  
769  
770  
771  
772  
773  
774  
775  
776  
777  
778  
779  
780  
781  
782  
783  
784  
785  
786  
787  
788  
789  
790  
791  
792  
793  
794  
795  
796  
797  
798  
799  
800  
801  
802  
803  
804  
805  
806  
807  
808  
809  
810  
811  
812  
813  
814  
815  
816  
817  
818  
819  
820  
821  
822  
823  
824  
825  
826  
827  
828  
829  
830  
831  
832  
833  
834  
835  
836  
837  
838  
839  
840  
841  
842  
843  
844  
845  
846  
847  
848  
849  
850  
851  
852  
853  
854  
855  
856  
857  
858  
859  
860  
861  
862  
863  
864  
865  
866  
867  
868  
869  
870  
871  
872  
873  
874  
875  
876  
877  
878  
879  
880  
881  
882  
883  
884  
885  
886  
887  
888  
889  
890  
891  
892  
893  
894  
895  
896  
897  
898  
899  
900  
901  
902  
903  
904  
905  
906  
907  
908  
909  
910  
911  
912  
913  
914  
915  
916  
917  
918  
919  
920  
921  
922  
923  
924  
925  
926  
927  
928  
929  
930  
931  
932  
933  
934  
935  
936  
937  
938  
939  
940  
941  
942  
943  
944  
945  
946  
947  
948  
949  
950  
951  
952  
953  
954  
955  
956  
957  
958  
959  
960  
961  
962  
963  
964  
965  
966  
967  
968  
969  
970  
971  
972  
973  
974  
975  
976  
977  
978  
979  
980  
981  
982  
983  
984  
985  
986  
987  
988  
989  
990  
991  
992  
993  
994  
995  
996  
997  
998  
999  
1000

1  
2  
3  
4  
5  
6 Mortality Database.<sup>5</sup> We used mortality categorized as five-year age groups from 35–39  
7  
8  
9 to 80–84 years of age. We defined participants who were 80–84 years old in 1950 as the  
10  
11  
12 1868 birth cohort. For each birth cohort, we took an average of the data from the birth  
13  
14  
15 cohorts within one year. These data cover the 1868–1972 birth cohorts.  
16  
17  
18  
19

## 20 21 **Results**

22  
23 Table 1 shows cumulative smoking initiation by sex and birth cohort. Men in the 1900  
24  
25 cohort, the oldest cohort with available data, showed the highest initiation, and the  
26  
27  
28 1900–1925 cohorts showed high initiation (>32%, >50%, and >80% at 15, 17, and 29  
29  
30 years old, respectively). Generally, from the 1900 cohort to the 1955 cohort, initiation  
31  
32 decreased successively with birth year except for the 15-year-old or younger age group.  
33  
34  
35 The oldest cohort for women, the 1898 cohort, showed the lowest initiation. Initiation  
36  
37  
38 increased clearly from the 1898 cohort to the 1925 cohort (2% to 12%, 4% to 24%, and  
39  
40  
41 13% to 54% at 15, 17, and 29 years old, respectively). From the 1925 cohort to the 1955  
42  
43  
44 cohort, initiation was stable at 24 and 29 years of age but increased at younger ages.  
45  
46  
47  
48

49 (Table 1 here)  
50  
51

52 Figure 1 shows changes with age in cumulative smoking initiation, prevalence, and  
53  
54  
55 lung cancer mortality for the 1905, 1925, and 1945 birth cohorts by sex. Smoking habits  
56  
57  
58  
59  
60

1  
2  
3  
4  
5  
6 differed largely among the cohorts, and the subsequent mortality ranged widely. A clear  
7  
8  
9 relationship between smoking and lung cancer mortality was seen regardless of sex.  
10  
11 Among the six cohorts, the 1905 female cohort showed the lowest initiation, prevalence,  
12  
13 and mortality. In contrast, the corresponding male cohort showed the highest initiation,  
14  
15 prevalence, and mortality. In the 1925 female cohort, the initiation, prevalence, and  
16  
17 mortality increased largely compared to the 1905 female cohort. Although the initiation  
18  
19 was higher in the 1945 female cohort compared with that in the 1925 female cohort, the  
20  
21 prevalence at later ages decreased to the level of 1905 female cohort, indicating that  
22  
23 these women stopped smoking. The mortality was between those of the 1905 and 1925  
24  
25 female cohorts to date. In men, initiation, prevalence, and mortality decreased  
26  
27 successively. Compared with the 1925 female cohort, the 1945 male cohort showed  
28  
29 much higher initiation but lower prevalence at later ages, and higher mortality to date.  
30  
31  
32  
33  
34  
35  
36  
37  
38  
39

40 (Figure 1 here)  
41  
42

43  
44 Figures 2 and 3 show changes with birth year in cumulative smoking initiation,  
45  
46 prevalence, and lung cancer mortality by age for men and women, respectively. In men,  
47  
48 mortality increased rapidly from the 1870 cohort to the 1905 cohort. In the 1870 cohort,  
49  
50 the mortality was already over 1 per 1000 in the 80–84 age group. In the 1900–1925  
51  
52 cohorts, which showed the high smoking initiation, the mortality exceeded 1 per 1000 at  
53  
54  
55  
56  
57  
58  
59  
60

1  
2  
3  
4  
5  
6 younger age (50–54 years old). After the early-1900s cohorts, the mortality decreased,  
7  
8  
9 and especially rapid decreases were seen between the late-1920s and the mid-1930s  
10  
11 cohorts. Correspondingly, the short-term troughs in initiation and prevalence were seen  
12  
13 in the mid-1930s cohorts.  
14  
15

16  
17  
18 (Figure 2 here)  
19

20  
21 In women, mortality increased from the 1870 cohort to the mid-1920s cohorts. Up  
22  
23 until the early-1890s cohorts, the mortality was below 1 per 1000 even in 80–84 year  
24  
25 olds. From the 1898 cohort to the 1925 cohort, smoking initiation clearly increased  
26  
27 (Table 1), and the age at which the mortality exceeded 1 per 1000 became younger  
28  
29 (75–79 to 60–64 years old). Between the late-1920s cohorts and the mid-1930s cohorts  
30  
31 the mortality decreased. Correspondingly, decreases in initiation and prevalence were  
32  
33 seen. After the mid-1930s cohort, initiation and prevalence increased again. The  
34  
35 mortality increased after they became 60–64 years old.  
36  
37  
38  
39  
40  
41  
42

43  
44 (Figure 3 here)  
45  
46  
47  
48

## 49 Discussion

50  
51  
52 In this paper, we quantitatively showed the long-term trends of smoking initiation in  
53  
54 Great Britain focusing on birth cohorts. Clear relationships were seen between smoking  
55  
56  
57  
58  
59  
60

1  
2  
3  
4  
5  
6 initiation and lung cancer mortality. The male cohorts with high smoking initiation in  
7  
8  
9 their teens had high lung cancer mortality. Clear increases in smoking initiation among  
10  
11  
12 female cohorts corresponded to the increases in lung cancer mortality. In women,  
13  
14  
15 smoking initiation increased after the mid-1930s cohorts, and their lung cancer  
16  
17  
18 mortality increased after 60–64 years of age. This suggests a long time lag between  
19  
20  
21 smoking initiation and lung cancer mortality.  
22  
23  
24  
25

### 26 **Strength and weakness of the study**

27  
28  
29 The age of smoking initiation was surveyed in 1954 in Denmark,<sup>9</sup> in 1970 in the  
30  
31  
32 U.S.,<sup>10</sup> and in some other countries. The survey in 1965 in Great Britain provides some  
33  
34  
35 of the oldest data about smoking initiation, and the repeated survey about initiation and  
36  
37  
38 mortality data in enough scale population provide stable estimates in this study. The  
39  
40  
41 cumulative initiation in this study was based on retrospective questionnaires. In the  
42  
43  
44 elderly, initiation may be underestimated because people who started smoking earlier  
45  
46  
47 tended to die younger. However, this bias would not change the finding that cohorts  
48  
49  
50 with high initiation showed high lung cancer mortality because elderly men showed the  
51  
52  
53 highest initiation. Considering the large differences in cumulative initiation across  
54  
55  
56 cohorts of elderly women, the possible underestimation would not change the finding  
57  
58  
59  
60

1  
2  
3  
4  
5  
6 that the clear increases of initiation corresponded with the increases in lung cancer  
7  
8 mortality.  
9

### 10 11 12 13 14 15 **Strength and weakness in relation to other studies**

16  
17 Relationships between smoking prevalence in adults and lung cancer mortality have  
18  
19 been analyzed by various authors.<sup>11-13</sup> However, smoking initiation and lung cancer  
20  
21 mortality in later life by birth cohort have rarely been presented together. To interpret  
22  
23 the lung cancer mortality of a particular age, we ideally need to know not only smoking  
24  
25 in the recent past but also smoking in their teens or twenties.<sup>14</sup> Starting to smoke before  
26  
27 15 years of age greatly increases mortality from lung cancer and other diseases.<sup>14 15</sup> The  
28  
29 duration of smoking is a strong determinant of lung cancer mortality,<sup>14</sup> and early  
30  
31 smoking initiation is correlated with the duration. Furthermore, earlier smoking  
32  
33 initiation may be associated with greater risk because early exposure to tobacco  
34  
35 products may enhance DNA damage.<sup>16 17</sup>  
36  
37  
38  
39  
40  
41  
42  
43  
44  
45  
46  
47  
48

### 49 50 **Unanswered questions and future research**

51  
52 After the mid-1920 cohorts, lung cancer mortality at later ages has not yet been  
53  
54 observed. Future data will reveal the impacts of increasing early initiation in women  
55  
56  
57  
58  
59  
60

1  
2  
3  
4  
5  
6 and the combined impacts of high early initiation and decreasing prevalence in men on  
7  
8  
9 lung cancer mortality at later ages. These are ecological comparisons, and accumulation  
10  
11  
12 of consistent results among countries is desirable.

13  
14 Smoking cessation greatly reduces mortality.<sup>13 18–20</sup> Based on a prospective cohort  
15  
16  
17 study among male British doctors, if people stop smoking before 30 years of age the  
18  
19  
20 risk almost disappears.<sup>18</sup> However, it is unclear that the result can be generalized to  
21  
22  
23 those who started smoking from a very young age. It is also unclear whether mortality  
24  
25  
26 later in life is the same level as in nonsmokers.  
27  
28  
29  
30  
31

### 32 **Implications for clinicians and policymakers**

33  
34  
35 Monitoring is one of policies against the tobacco epidemic.<sup>1</sup> Because this study  
36  
37  
38 showed the long time lag between smoking initiation and lung cancer mortality within  
39  
40  
41 cohorts compared with possible rapid changes in smoking habits across cohorts,  
42  
43  
44 age-specific measures focusing on birth cohorts should be monitored. A repeated  
45  
46  
47 cross-sectional nationwide survey is suited to obtain long-term population data.<sup>21 22</sup> The  
48  
49  
50 results should be reported by age so that birth cohorts can be specified. If age categories  
51  
52  
53 have the same intervals, birth cohorts can be easily specified. In a cohort, cumulative  
54  
55  
56 smoking initiation tends to increase steeply with age, so the initiation age should be  
57  
58  
59  
60

1  
2  
3  
4  
5  
6 reported by detailed categories.  
7  
8

9 For cohorts born in the 19th century, smoking initiation and lung cancer mortality at  
10 younger ages were unclear even in this study. Lung cancer mortality is used as an  
11 indicator of past smoking habits due to its strong relationship to smoking.<sup>23</sup> Lung cancer  
12 mortality in nonsmokers was less than 1 per 1000 even at 80–84 years of age.<sup>24</sup> Based  
13 on the WHO mortality database,<sup>5</sup> lung cancer mortality in a birth cohort has rarely  
14 exceeded 1 per 1000 at 45–49 years old or 10 per 1000 even at 80–84 years old to date,  
15 with few exceptions. The mortality from lung and pleural cancer in England and Wales  
16 from 1911 was reported.<sup>25</sup> From the late-1860s to the mid-1880s cohorts of men in  
17 England and Wales, the age at which the mortality from lung and pleural cancer  
18 exceeded 1 per 1000 quickly became younger (from >79 to 55–59 years old).  
19 Considering these values, male 1900s cohorts experienced one of the highest lung  
20 cancer mortality and probably one of the worst smoking habit. In the early 1900s, lung  
21 cancer was a rare disease.<sup>26</sup> Most men in the 1900s cohorts started smoking in their  
22 teens. In the mid 1970s, over a half century later, the age-standardized male lung cancer  
23 mortality peaked in England and Wales.<sup>26</sup>  
24  
25  
26  
27  
28  
29  
30  
31  
32  
33  
34  
35  
36  
37  
38  
39  
40  
41  
42  
43  
44  
45  
46  
47  
48  
49  
50

51  
52 The great majority of smokers begin to use tobacco before the age of 18 in most  
53 countries.<sup>27</sup> However, most data about smoking initiation have been collected in recent  
54  
55  
56  
57  
58  
59  
60



1  
2  
3  
4  
5  
6 decades and/or from developed countries. There are large differences in smoking  
7  
8  
9 initiation across birth cohorts in a country and across countries. For example, in Japan,  
10  
11 smoking by minors under 20 years of age has been banned since 1900, and male lung  
12  
13 cancer mortality has been relatively low (exceeded 1 per 1000 at 60–64 years old or  
14  
15 older) in spite of high smoking prevalence. Countries with rapid increases in smoking  
16  
17 initiation in teens should not underestimate the risk in the distant future and should take  
18  
19 swift action to prevent smoking and to promote early cessation.  
20  
21  
22  
23  
24  
25  
26  
27  
28

29 Contributors: IF designed the study, acquired and analyzed the data, and prepared the  
30  
31 manuscript. TF advised on the analysis and interpretation and commented on the drafts  
32  
33 of the manuscript. EY commented on the drafts of the manuscript. All authors  
34  
35 interpreted the data and were involved in drafting the manuscript. IF is the guarantor.  
36  
37  
38  
39

40 Funding: This work was funded by Grant in Aid for Scientific Research (C) [80407931  
41  
42 to I.F.] from the Ministry of Education, Culture, Sports, Science, and Technology, Japan.  
43  
44  
45

46 Competing interests: None.  
47

48 Ethical approval: Not required.  
49

50 Data sharing: No additional data available.  
51  
52  
53  
54  
55  
56  
57  
58  
59  
60

## References

- 1 World Health Organization. WHO report on the global tobacco epidemic, 2008: The MPOWER package. Geneva: World Health Organization, 2008.
- 2 Mackay J, Eriksen M. The tobacco atlas. Geneva: World Health Organization, 2002.
- 3 Yang G, Fan L, Tan J, *et al.* Smoking in China: findings of the 1996 National Prevalence Survey. *JAMA* 1999; 282: 1247–53.
- 4 Wald N, Nicolaides-Bouman A, eds. UK smoking statistics, 2nd edn. London and Oxford: Wolfson Institute of Preventive Medicine and Oxford University Press, 1991.
- 5 World Health Organization. The detailed data files of the WHO Mortality Database, 2010. <http://www.who.int/whosis/mort/download/en/index.html> (accessed May 7, 2012).
- 6 Forey B, Lee P. Supplement 2, estimating past smoking habits by an indirect method. An investigation into a method based on recall, with application to Great Britain. In: Forey B, Hamling J, Hamling J, *et al.*, eds. International smoking statistics, web edn. Surton: P N Lee Statistics and Computing Ltd., 2002. <http://www.pnlee.co.uk/ISS.htm> (accessed July 21, 2011).

- 1  
2  
3  
4  
5  
6 7 Forey B, Hamling J, Lee P, *et al.*, eds. International smoking statistics. A collection  
8  
9 of historical data from 30 economically developed countries, 2nd edn. Oxford:  
10  
11 Oxford University Press, 2002.  
12  
13  
14  
15 8 Forey B, Hamling J, Hamling J, *et al.*, eds. International smoking statistics, web  
16  
17 edn. A collection of worldwide historical data, United Kingdom. Surton: P N Lee  
18  
19 Statistics and Computing Ltd.; 2009. <http://www.pnlee.co.uk/ISS.htm> (accessed  
20  
21 July 21, 2011).  
22  
23  
24  
25  
26 9 Osler M. Smoking habits in Denmark from 1953 to 1991: a comparative analysis of  
27  
28 results from three nationwide health surveys among adult Danes in 1953–1954,  
29  
30 1986–1987 and 1990–1991. *Int J Epidemiol* 1992; 21: 862–71.  
31  
32  
33  
34  
35 10 Burns DM, Lee L, Shen LZ, *et al.* Cigarette smoking behavior in the United States.  
36  
37 In: Burns DM, Garlfinkel L, Samet J, eds. Smoking and tobacco control monograph  
38  
39 No. 8. Bethesda: Department of Health and Human Services, National Institute of  
40  
41 Health, National Cancer Institute, 1997, pp. 13–112.  
42  
43  
44  
45  
46 11 Townsend JL. Smoking and lung cancer: a cohort data study of men and women in  
47  
48 England and Wales 1935–70. *J R Stat Soc Ser A Stat Soc* 1978; 141: 95–107.  
49  
50  
51  
52 12 Stevens RG, Moolgavkar SH. A cohort analysis of lung cancer and smoking in  
53  
54 British males. *Am J Epidemiol* 1984; 119: 624–41.  
55  
56  
57  
58  
59  
60

- 1  
2  
3  
4  
5  
6 13 IARC. IARC handbooks of cancer prevention, tobacco control, Vol. 11: Reversal of  
7  
8 risk after quitting smoking. Lyon: International Agency for Research on Cancer,  
9  
10 2007.  
11  
12  
13  
14 14 Doll R, Peto R. The causes of cancer: quantitative estimates of avoidable risks of  
15  
16 cancer in the United States today. *J Natl Cancer Inst* 1981; 66: 1191–308.  
17  
18  
19  
20 15 Hirayama T. Life-style and mortality: a large-scale census-based cohort study in  
21  
22 Japan. Basel: Karger, 1990.  
23  
24  
25  
26 16 Wiencke JK, Thurston SW, Kelsey KT, et al. Early age at smoking initiation and  
27  
28 tobacco carcinogen DNA damage in the lung. *J Natl Cancer Inst* 1999; 91: 614–9.  
29  
30  
31  
32 17 Wiencke JK, Kelsey KT. Teen smoking, field cancerization, and a "critical period"  
33  
34 hypothesis for lung cancer susceptibility. *Environ Health Perspect* 2002; 110:  
35  
36 555–8.  
37  
38  
39  
40 18 Peto R, Darby S, Deo H, et al. Smoking, smoking cessation, and lung cancer in the  
41  
42 UK since 1950: combination of national statistics with two case-control studies.  
43  
44 *BMJ* 2000; 321: 323–9.  
45  
46  
47  
48  
49 19 Doll R, Peto R, Boreham J, et al. Mortality in relation to smoking: 50 years'  
50  
51 observations on male British doctors. *BMJ* 2004; 328: 1519–28.  
52  
53  
54  
55 20 Kenfield SA, Stampfer MJ, Rosner BA, et al. Smoking and smoking cessation in  
56  
57  
58  
59  
60

- 1  
2  
3  
4  
5  
6 relation to mortality in women. *JAMA* 2008; 299: 2037–47  
7  
8  
9 21 Funatogawa I, Funatogawa T, Yano E. Do overweight children necessarily make  
10  
11 overweight adults? Repeated cross sectional annual nationwide survey of Japanese  
12  
13 girls and women over nearly six decades. *BMJ* 2008; 337: a802.  
14  
15  
16  
17 22 Funatogawa I, Funatogawa T, Nakao M, *et al.* Changes in body mass index by birth  
18  
19 cohort in Japanese adults: results from the National Nutrition Survey of Japan  
20  
21 1956–2005. *Int J Epidemiol* 2009; 38: 83–92.  
22  
23  
24  
25  
26 23 Peto R, Lopez AD, Boreham J, *et al.* Mortality from tobacco in developed  
27  
28 countries: indirect estimation from national vital statistics. *Lancet* 1992; 339:  
29  
30 1268–78.  
31  
32  
33  
34  
35 24 Thun MJ, Henley SJ, Burns D, *et al.* Lung cancer death rates in lifelong  
36  
37 nonsmokers. *J Natl Cancer Inst* 2006; 98: 691–9.  
38  
39  
40  
41 25 MacMahon B, Trichopoulos D. *Epidemiology Principles and Methods*, 2nd edn.  
42  
43 Boston: Little, Brown Company, 1996.  
44  
45  
46  
47 26 Quinn M, Babb P, Brock A, *et al.* *Cancer trends in England and Wales 1950–1999*.  
48  
49 Studies on Medical and Population Subjects NO. 66. London: The Stationery Office,  
50  
51 2001.  
52  
53  
54  
55 27 Shafey O, Dolwick S, Guindon GE, eds. *The Tobacco Control Country Profiles*,  
56  
57  
58  
59  
60

1  
2  
3  
4  
5  
6  
7  
8  
9  
10  
11  
12  
13  
14  
15  
16  
17  
18  
19  
20  
21  
22  
23  
24  
25  
26  
27  
28  
29  
30  
31  
32  
33  
34  
35  
36  
37  
38  
39  
40  
41  
42  
43  
44  
45  
46  
47  
48  
49  
50  
51  
52  
53  
54  
55  
56  
57  
58  
59  
60

2nd edn. Atlanta: American Cancer Society, Inc., World Health Organization, and  
International Union Against Cancer, 2003.

For peer review only

1  
2  
3  
4  
5  
6 Figure Legends  
7  
8

9 Fig 1 Changes with age in cumulative smoking initiation, prevalence, and lung cancer  
10 mortality for the 1905, 1925 and 1945 birth cohorts of British men and women. Data are  
11 from the survey of the Tobacco Advisory Council in 1965–1987 for initiation, the  
12 Health and Lifestyle Study in 1984–1985 and the General Household Survey in  
13 1998–2002 for prevalence, and the WHO mortality database for lung cancer mortality in  
14 1950–2009. Initiation for people 65 years old or over in 1971–1975 was used for the  
15 1905 birth cohort.  
16  
17  
18  
19  
20  
21  
22  
23  
24  
25  
26  
27  
28  
29  
30  
31

32 Fig 2 Changes with birth year in cumulative smoking initiation, prevalence, and lung  
33 cancer mortality by age for British men. Data are from the survey of the Tobacco  
34 Advisory Council (TAC) in 1965–1987 for initiation, the survey of the TAC in  
35 1948–1975 and the General Household Survey in 1972–2005 for prevalence, and the  
36 WHO mortality database for lung cancer mortality in 1950–2009.  
37  
38  
39  
40  
41  
42  
43  
44  
45  
46  
47  
48

49 Fig 3 Changes with birth year in cumulative smoking initiation, prevalence, and lung  
50 cancer mortality by age for British women. Data are from the survey of the Tobacco  
51 Advisory Council (TAC) in 1965–1987 for initiation, the survey of the TAC in  
52  
53  
54  
55  
56  
57  
58  
59  
60

1  
2  
3  
4  
5  
6  
7  
8  
9  
10  
11  
12  
13  
14  
15  
16  
17  
18  
19  
20  
21  
22  
23  
24  
25  
26  
27  
28  
29  
30  
31  
32  
33  
34  
35  
36  
37  
38  
39  
40  
41  
42  
43  
44  
45  
46  
47  
48  
49  
50  
51  
52  
53  
54  
55  
56  
57  
58  
59  
60

1948–1975 and the General Household Survey in 1972–2005 for prevalence, and the WHO mortality database for lung cancer mortality in 1950–2009.

For peer review only



Table 1. Cumulative smoking initiation by birth cohort (1898 to 1965) from the survey of the Tobacco Advisory Council, Great Britain, 1948–1987.

| Men          |                           |    |    |    |    |    | Women        |                           |    |    |    |    |    |
|--------------|---------------------------|----|----|----|----|----|--------------|---------------------------|----|----|----|----|----|
| Birth cohort | Cumulative initiation (%) |    |    |    |    |    | Birth cohort | Cumulative initiation (%) |    |    |    |    |    |
|              | Age (years)               |    |    |    |    |    |              | Age (years)               |    |    |    |    |    |
|              | 13                        | 15 | 17 | 19 | 24 | 29 |              | 13                        | 15 | 17 | 19 | 24 | 29 |
| 1900         | -                         | 34 | 58 | 70 | 83 | 86 | 1898         | -                         | 2  | 4  | 7  | 11 | 13 |
| 1906         | -                         | 34 | 58 | 70 | 82 | 84 | 1904         | -                         | 3  | 7  | 10 | 17 | 20 |
| 1913         | 11                        | 32 | 51 | 63 | 76 | 80 | 1911         | 1                         | 6  | 12 | 17 | 26 | 41 |
| 1925         | 12                        | 33 | 51 | 66 | 77 | 80 | 1925         | 2                         | 12 | 24 | 36 | 49 | 53 |
| 1935         | -                         | 23 | 47 | 65 | 74 | -  | 1935         | -                         | 8  | 23 | 37 | 48 | -  |
| 1945         | 9                         | 29 | 51 | 61 | 68 | 67 | 1945         | 3                         | 13 | 32 | 44 | 52 | 52 |
| 1955         | 10                        | 29 | 47 | 55 | 59 | 60 | 1955         | 5                         | 21 | 38 | 47 | 51 | 53 |
| 1965         | 13                        | 32 | 45 | 49 | -  | -  | 1965         | 8                         | 24 | 37 | 44 | -  | -  |

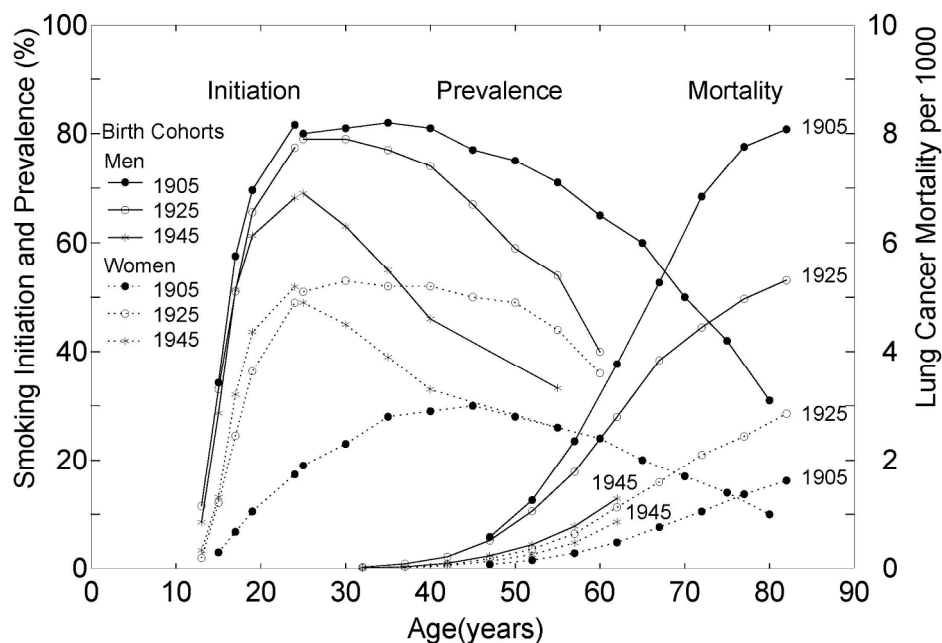

Fig 1 Changes with age in cumulative smoking initiation, prevalence, and lung cancer mortality for the 1905, 1925 and 1945 birth cohorts of British men and women. Data are from the survey of the Tobacco Advisory Council in 1965–1987 for initiation, the Health and Lifestyle Study in 1984–1985 and the General Household Survey in 1998–2002 for prevalence, and the WHO mortality database for lung cancer mortality in 1950–2009. Initiation for people 65 years old or over in 1971–1975 was used for the 1905 birth cohort.  
297x210mm (200 x 200 DPI)

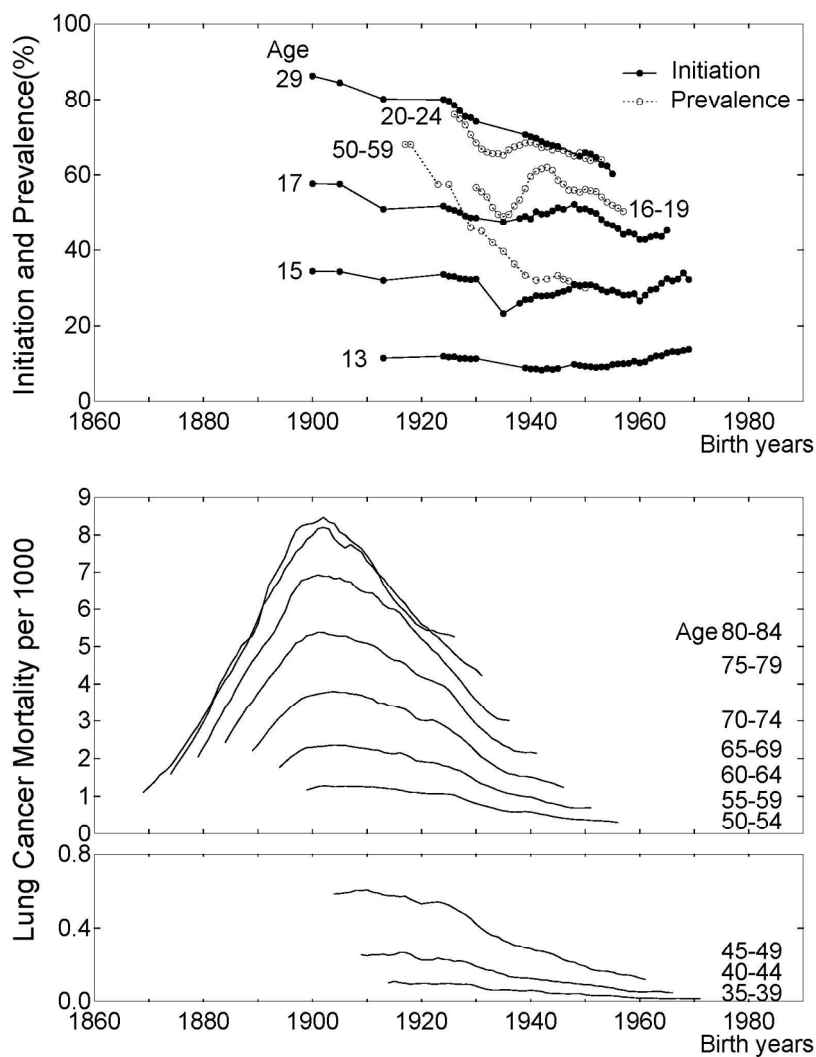

Fig 2 Changes with birth year in cumulative smoking initiation, prevalence, and lung cancer mortality by age for British men. Data are from the survey of the Tobacco Advisory Council (TAC) in 1965–1987 for initiation, the survey of the TAC in 1948–1975 and the General Household Survey in 1972–2005 for prevalence, and the WHO mortality database for lung cancer mortality in 1950–2009.  
210x297mm (200 x 200 DPI)

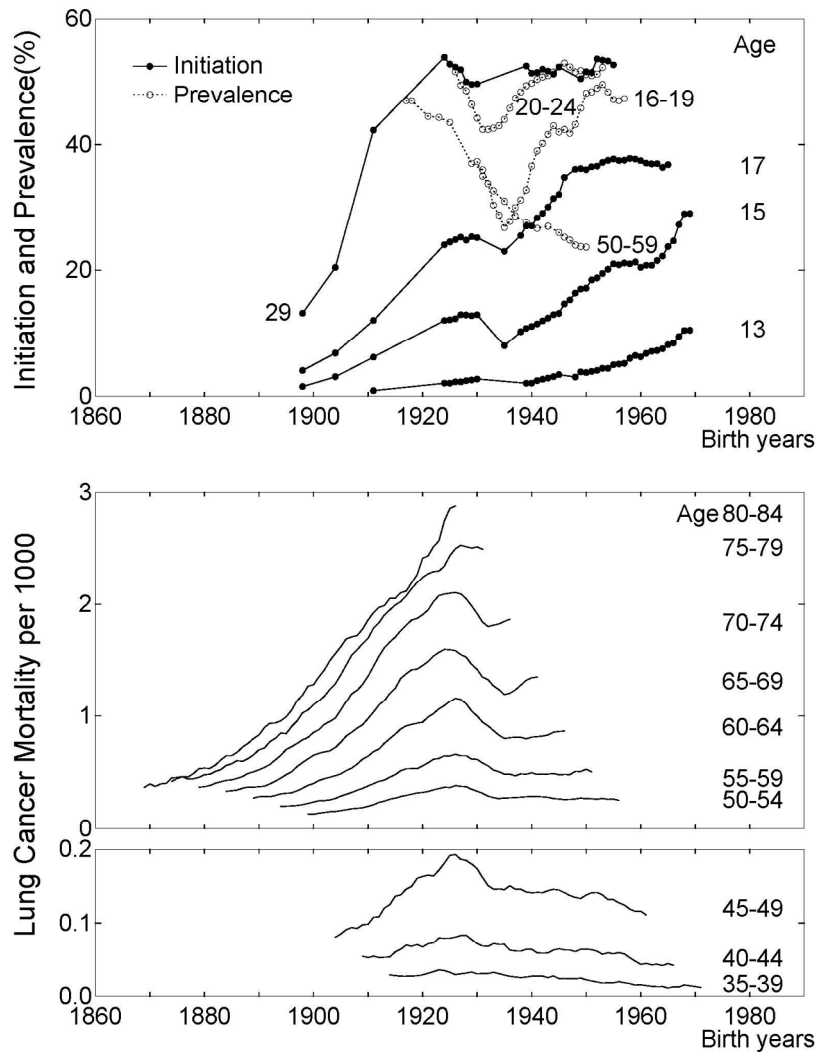

Fig 3 Changes with birth year in cumulative smoking initiation, prevalence, and lung cancer mortality by age for British women. Data are from the survey of the Tobacco Advisory Council (TAC) in 1965–1987 for initiation, the survey of the TAC in 1948–1975 and the General Household Survey in 1972–2005 for prevalence, and the WHO mortality database for lung cancer mortality in 1950–2009.  
210x297mm (200 x 200 DPI)

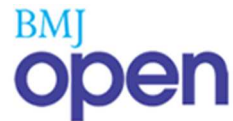

**Impacts of early smoking initiation: long-term trends of lung cancer mortality and smoking initiation from repeated cross-sectional surveys in Great Britain**

|                                 |                                                                                                                                                                                                                                                                                                  |
|---------------------------------|--------------------------------------------------------------------------------------------------------------------------------------------------------------------------------------------------------------------------------------------------------------------------------------------------|
| Journal:                        | <i>BMJ Open</i>                                                                                                                                                                                                                                                                                  |
| Manuscript ID:                  | bmjopen-2012-001676.R1                                                                                                                                                                                                                                                                           |
| Article Type:                   | Research                                                                                                                                                                                                                                                                                         |
| Date Submitted by the Author:   | 24-Aug-2012                                                                                                                                                                                                                                                                                      |
| Complete List of Authors:       | Funatogawa, Ikuko; Teikyo University Graduate School of Public Health, Department of Public Health<br>Funatogawa, Takashi; Chugai Pharmaceutical Co., Ltd., Clinical research planning department<br>Yano, Eiji; Teikyo University Graduate School of Public Health, Department of Public Health |
| <b>Primary Subject Heading</b>: | Smoking and tobacco                                                                                                                                                                                                                                                                              |
| Secondary Subject Heading:      | Public health, Epidemiology, Oncology, Respiratory medicine                                                                                                                                                                                                                                      |
| Keywords:                       | PUBLIC HEALTH, Epidemiology < ONCOLOGY, PREVENTIVE MEDICINE, STATISTICS & RESEARCH METHODS                                                                                                                                                                                                       |
|                                 |                                                                                                                                                                                                                                                                                                  |

SCHOLARONE™  
Manuscripts

1  
2  
3  
4  
5  
6 **Impacts of early smoking initiation: long-term trends of lung cancer mortality and**  
7  
8  
9 **smoking initiation from repeated cross-sectional surveys in Great Britain**  
10  
11  
12  
13

14  
15 Ikuko Funatogawa, Takashi Funatogawa *statistician*, Eiji Yano

16  
17 Teikyo University Graduate School of Public Health, 2-11-1 Kaga, Itabashi-ku, Tokyo

18  
19  
20 173-8605, Japan Ikuko Funatogawa *associate professor* Chugai Pharmaceutical Co.,

21  
22  
23 Ltd., 2-1-1 Nihonbashi Muromachi, Chuo-ku, Tokyo, 103-8324, Japan Takashi

24  
25  
26 Funatogawa *statistician* Teikyo University Graduate School of Public Health, 2-11-1

27  
28  
29 Kaga, Itabashi-ku, Tokyo 173-8605, Japan Ikuko Funatogawa *professor*

30  
31  
32 Correspondance to: I Funatogawa, Teikyo University Graduate School of Public Health,

33  
34  
35 2-11-1 Kaga, Itabashi-ku, Tokyo 173-8605, Japan ifunatogawa-tky@umin.ac.jp, Tel:

36  
37  
38 +81 3-3964-1211, Fax: +81 3-3964-1058,

39  
40  
41 Running title: Impacts of early smoking initiation

42  
43  
44  
45  
46 Words count for the abstract: 271

47  
48  
49 Words count for the text: 2769

50  
51  
52 The number of figures: 3

53  
54  
55 The number of tables: 1

**ABSTRACT**

**Objective** To show long-term trends of smoking initiation in Great Britain including unanalyzed data and assess the impact of early smoking initiation on the lung cancer mortality in later ages focusing on birth cohorts.

**Design** Reanalysis of repeated cross-sectional surveys conducted thirteen times during 1965–1987.

**Setting** Great Britain.

**Participants** Men and women aged 16 years and over in each survey.

**Primary outcome measures** Smoking initiation for 1898–1969 birth cohorts and lung cancer mortality in 1950–2009.

**Results** In men, 1900–1925 birth cohorts showed high smoking initiation (>32%, >50%, and >80% at 15, 17, and 29 years old, respectively). Correspondingly, the lung cancer mortality in these cohorts exceeded 1 per 1000 at a young age (50–54 years old). In women, smoking initiation increased clearly from the 1898 cohort to the 1925 cohort (2% to 12%, 4% to 24%, and 13% to 54% at 15, 17, and 29 years old, respectively). Correspondingly, the age at which the mortality exceeded 1 per 1000 became younger (75–79 to 60–64 years old). In both men and women, short-term decreases in initiation were seen from the late-1920s cohorts. Correspondingly, lung cancer mortality

1  
2  
3  
4  
5  
6 decreased. In women, initiation increased again after the mid-1930s cohorts, and  
7  
8 mortality increased after they became 60–64 years old.

9  
10  
11 **Conclusions** Clear relationships between smoking initiation and lung cancer mortality  
12  
13 across birth cohorts were observed. Countries with rapid increases in initiation in teens  
14  
15 should not underestimate the risk in the distant future. Because of the long time lags  
16  
17 within cohorts compared with rapid changes in smoking habits across cohorts,  
18  
19 age-specific measures focusing on birth cohorts should be monitored.  
20  
21  
22  
23  
24  
25  
26  
27  
28

29 **Key words:** Birth cohort; cross-sectional study; Great Britain; lung cancer mortality;  
30  
31 smoking; smoking initiation; tobacco  
32  
33  
34  
35  
36  
37

38 **Article focus:**

- 39  
40  
41 • Starting to smoke before 15 years of age greatly increased mortality from lung  
42  
43 cancer and other diseases in cohort studies.  
44  
45  
46 • Available data concerning smoking initiation and subsequent lung cancer mortality  
47  
48 in later age by birth cohort are limited in most countries.  
49  
50  
51  
52  
53  
54

55 **Key messages:**  
56  
57  
58  
59  
60



- The male birth cohorts with high smoking initiation in their teens had high lung cancer mortality, and clear increases in smoking initiation among female cohorts corresponded to the increases in lung cancer mortality.
- Short-term decreases in smoking initiation seen from the late-1920s cohorts corresponded to the decreases in lung cancer mortality.
- In women, smoking initiation increased after the mid-1930s cohorts, and their lung cancer mortality increased after 60–64 years of age, suggesting a long time lag.

**Strength and limitations of this study:**

- The survey from 1965 in Great Britain provides some of the oldest data about smoking initiation, and the repeated survey about initiation and mortality data in enough scale population provide stable estimates in this study.
- The cumulative initiation in this study was based on retrospective questionnaires, and initiation may be underestimated in the elderly.

## Introduction

Smoking causes many adverse health effects including lung cancer, cardiovascular diseases, and respiratory diseases.<sup>1</sup> Despite its known harmful health effects, almost one billion men and 250 million women in the world smoke.<sup>2</sup> The tobacco epidemic has shifted to developing countries.<sup>1</sup> Furthermore, some countries have experienced a rapid increase in smoking initiation among teens.<sup>3</sup> Because there are long time lags between smoking initiation and smoking-attributed mortalities which become apparent only in mid-to-late adulthood, the impacts of early smoking initiation tend to be unclear.

For global public health, it is important to know smoking and subsequent mortality data in several birth cohorts with various smoking habits. However, available data are limited, especially about smoking initiation. In Great Britain, the age of smoking initiation was frequently surveyed between 1965 and 1987,<sup>4</sup> but birth cohorts were not specified. In this paper, we quantitatively estimated long-term trends of smoking initiation and showed the relationship to the lung cancer mortality focusing on birth cohorts.

## Methods

### Smoking Initiation

From 1948 to 1987, the Tobacco Advisory Council conducted an annual survey on

1  
2  
3  
4  
5  
6 smoking habits in Great Britain (England, Wales, and Scotland).<sup>4</sup> Most of these surveys  
7  
8 interviewed about 10 000 people. The age of initiation was reported from the thirteen  
9  
10 surveys conducted in 1965, 1968, 1971, 1973, 1975, 1978, and annually during  
11  
12 1981–1987 as percentages of people who started smoking any tobacco by sex and age  
13  
14 group at the time of survey. Age of initiation was categorized as <14 (1975–1987),  
15  
16 14–15 (1975–1987), <16 (1965–1973), 16–17, 18–19, 20–24, 25–29, >29, ‘Don’t  
17  
18 know,’ and ‘Never smoked for as long as a year’ (1965–1987). The percentages of  
19  
20 ‘Don’t know’ were <5% in women, <6% in men aged <35 years, and <11% in older  
21  
22 men, and we excluded this category in the analysis. For initiation data, age at the time of  
23  
24 survey was categorized as 16–19 (1965–1987), 20–24 (1965–1987), 25–34 (1965–1975),  
25  
26 25–29 (1975–1987), 30–34 (1981–1987), 35–59 (1965–1975), 35–49 (1981–1987),  
27  
28 50–64 (1981–1987), >59 (1965–1975), and >64 (1981–1987). We defined the birth year  
29  
30 using the median age or next larger integer; thus, people aged 16–19 years in 1987 were  
31  
32 defined as the 1969 birth cohort (1987 minus 18). For the categories >59 and >64, the  
33  
34 median age was estimated from population statistics.<sup>5</sup> We excluded the data for 35–59  
35  
36 years of age because the range was too wide. We calculated the cumulative proportion  
37  
38 of people who began smoking by specified ages. Then, for each birth cohort, except  
39  
40 cohorts that had no observations, we estimated cumulative initiation by taking an  
41  
42  
43  
44  
45  
46  
47  
48  
49  
50  
51  
52  
53  
54  
55  
56  
57  
58  
59  
60

1  
2  
3  
4  
5  
6 average of the data in a time window of five years as a smoothing method. For example,  
7  
8  
9 cumulative initiation of the 1967 birth cohort is estimated from the average of the data  
10  
11 for the 1965–1969 birth cohorts. In the age categories of >59 or >64, cumulative  
12  
13 initiation and birth years were estimated by taking an average of data for the periods of  
14  
15  
16  
17  
18 1965–1968, 1971–1975, and 1981–1987. These cover the 1898–1969 cohorts.  
19  
20  
21  
22

### 23 **Smoking Prevalence**

24  
25  
26 To show changes in age-specific prevalence with birth year, we used data from the  
27  
28 annual survey of the Tobacco Advisory Council in 1948–1975 and the General  
29  
30 Household Survey in 1972–2005 conducted in Great Britain.<sup>7 8</sup> Most of the surveys of  
31  
32 the Tobacco Advisory Council interviewed about 10 000 people, and the General  
33  
34 Household Survey interviewed 12 000 households or more. We used prevalence  
35  
36 reported annually for 16–19 and 20–24 year olds in 1948–1975, and 50–59 year olds for  
37  
38 18 years during 1972–2005. We used prevalence of all tobacco products except women  
39  
40 in the survey of the Tobacco Advisory Council. For them, we used prevalence of  
41  
42 manufactured cigarettes, as few women smoked products other than cigarettes and the  
43  
44 prevalence of all tobacco products were not reported for several years. The prevalence  
45  
46 included occasional smokers. In the same manner as the smoking initiation, we defined  
47  
48  
49  
50  
51  
52  
53  
54  
55  
56  
57  
58  
59  
60

1  
2  
3  
4  
5  
6 birth year and estimated the average prevalence. These surveys cover the 1917–1987  
7  
8 cohorts.  
9

### 10 11 12 13 14 15 **Lung cancer mortality** 16

17 We calculated annual lung cancer mortality rates between 1950 and 2009 in Great  
18  
19 Britain based on data in England and Wales and data in Scotland from the WHO  
20  
21 Mortality Database.<sup>5</sup> We used mortality categorized as five-year age groups from 35–39  
22  
23 to 80–84 years of age. We defined participants who were 80–84 years old in 1950 as the  
24  
25 1868 birth cohort. For each birth cohort, we took an average of the data from the birth  
26  
27 cohorts within one year. These data cover the 1868–1972 birth cohorts.  
28  
29  
30  
31  
32  
33  
34  
35  
36  
37

### 38 **Statistical Analysis** 39

40 We showed changes with birth year in the cumulative smoking initiation, smoking  
41  
42 prevalence, and lung cancer mortality at specified ages. Trends including peaks and  
43  
44 troughs in these indicators were assessed. Lung cancer mortality in later ages has been  
45  
46 already observed up until the mid-1920s cohorts.  
47  
48  
49  
50

### 51 52 53 54 55 **Results** 56 57 58 59 60

1  
2  
3  
4  
5  
6 Table 1 shows cumulative smoking initiation by sex and birth cohort. Men in the 1900  
7  
8 cohort, the oldest cohort with available data, showed the highest initiation, and the  
9  
10 1900–1925 cohorts showed high initiation (>32%, >50%, and >80% at 15, 17, and 29  
11  
12 years old, respectively). Generally, from the 1900 cohort to the 1955 cohort, initiation  
13  
14 decreased successively with birth year except for the 15-year-old or younger age group.  
15  
16  
17  
18 The oldest cohort for women, the 1898 cohort, showed the lowest initiation. Initiation  
19  
20 increased clearly from the 1898 cohort to the 1925 cohort (2% to 12%, 4% to 24%, and  
21  
22 13% to 54% at 15, 17, and 29 years old, respectively). From the 1925 cohort to the 1955  
23  
24 cohort, initiation was stable at 24 and 29 years of age but increased at younger ages.  
25  
26  
27  
28  
29  
30  
31

32 (Table 1 here)  
33  
34

35 Figures 1 and 2 show changes with birth year in cumulative smoking initiation,  
36  
37 prevalence, and lung cancer mortality by age for men and women, respectively. In men,  
38  
39 mortality increased rapidly from the 1870 cohort to the 1905 cohort. In the 1870 cohort,  
40  
41 the mortality was already over 1 per 1000 in the 80–84 age group. In the 1900–1925  
42  
43 cohorts, which showed the high smoking initiation, the mortality exceeded 1 per 1000 at  
44  
45 younger age (50–54 years old). After the early-1900s cohorts, the mortality decreased,  
46  
47 and especially rapid decreases were seen between the late-1920s and the mid-1930s  
48  
49 cohorts. Correspondingly, the short-term troughs in initiation and prevalence in 16–19  
50  
51  
52  
53  
54  
55  
56  
57  
58  
59  
60

1  
2  
3  
4  
5  
6 and 20–24 years old were seen in the mid-1930s cohorts.  
7

8  
9 (Figure 1 here)  
10

11 In women, mortality increased from the 1870 cohort to the mid-1920s cohorts. Up  
12 until the early-1890s cohorts, the mortality was below 1 per 1000 even in 80–84 year  
13 olds. From the 1898 cohort to the 1925 cohort, smoking initiation clearly increased  
14 (Table 1), and the age at which the mortality exceeded 1 per 1000 became younger  
15 (75–79 to 60–64 years old). Between the late-1920s cohorts and the mid-1930s cohorts  
16 the mortality decreased. Correspondingly, decreases in initiation and prevalence were  
17 seen. After the mid-1930s cohort, initiation and prevalence in 16–19 and 20–24 years  
18 old increased again, but prevalence in 50–59 years old did not increase. The mortality  
19 increased after they became 60–64 years old.  
20  
21  
22  
23  
24  
25  
26  
27  
28  
29  
30  
31  
32  
33  
34  
35  
36  
37

38 (Figure 2 here)  
39  
40  
41  
42

### 43 **Discussion**

44  
45 In this paper, we quantitatively showed the long-term trends of smoking initiation in  
46 Great Britain focusing on birth cohorts. Clear relationships were seen between smoking  
47 initiation and lung cancer mortality. The male cohorts with high smoking initiation in  
48 their teens had high lung cancer mortality. Clear increases in smoking initiation among  
49  
50  
51  
52  
53  
54  
55  
56  
57  
58  
59  
60

1  
2  
3  
4  
5  
6 female cohorts corresponded to the increases in lung cancer mortality. In women,  
7  
8  
9 smoking initiation increased after the mid-1930s cohorts, and their lung cancer  
10  
11  
12 mortality increased after 60–64 years of age. This suggests a long time lag between  
13  
14  
15 smoking initiation and lung cancer mortality.  
16  
17  
18  
19

### 20 **Strength and weakness of the study**

21  
22  
23 The age of smoking initiation was surveyed in 1954 in Denmark,<sup>9</sup> in 1970 in the  
24  
25 U.S.,<sup>10</sup> and in some other countries. The survey in 1965 in Great Britain provides some  
26  
27  
28 of the oldest data about smoking initiation, and the repeated survey about initiation and  
29  
30  
31 mortality data in enough scale population provide stable estimates in this study. The  
32  
33  
34 cumulative initiation in this study was based on retrospective questionnaires. In the  
35  
36  
37 elderly, cumulative initiation may be underestimated because people who started  
38  
39  
40 smoking earlier tended to die younger. Elderly may also report older age of initiation  
41  
42  
43 than their actual age of initiation. However, these biases would not change the finding  
44  
45  
46 that cohorts with high initiation showed high lung cancer mortality because elderly men  
47  
48  
49 showed the highest initiation. Considering the large differences in cumulative initiation  
50  
51  
52 across cohorts of elderly women, the possible underestimation would not change the  
53  
54  
55 finding that the clear increases of initiation corresponded with the increases in lung  
56  
57  
58  
59  
60



1  
2  
3  
4  
5  
6 cancer mortality. Since 1908, the sale of tobacco to children under the age of 16 has  
7  
8  
9 been prohibited. The age rose to 18 in 2007. The cumulative initiation at the age of 15  
10  
11 was about 30% other than around the mid-1930s birth cohorts in men, but it changed  
12  
13 largely in women. These suggest that social norms about the smoking were not changed  
14  
15 largely in male children, but these were changed in female children. Females under tight  
16  
17 social norms might report older age of initiation than their actual age of initiation.  
18  
19 However, considering the high cumulative initiation at the age of 24 (about 50%), the  
20  
21 social norm would not be so strict compared to some other countries and this possible  
22  
23 bias would not change the findings.  
24  
25  
26  
27  
28  
29  
30  
31  
32  
33  
34

### 35 **Strength and weakness in relation to other studies**

36  
37 Relationships between smoking prevalence in adults and lung cancer mortality have  
38  
39 been analyzed by various authors.<sup>11-13</sup> However, smoking initiation and lung cancer  
40  
41 mortality in later life by birth cohort have rarely been presented together regardless of  
42  
43 its importance. To interpret the lung cancer mortality of a particular age, we ideally  
44  
45 need to know not only smoking in the recent past but also smoking in their teens or  
46  
47 twenties.<sup>14</sup> Starting to smoke before 15 years of age greatly increases mortality from  
48  
49 lung cancer and other diseases.<sup>14 15</sup> The duration of smoking is a strong determinant of  
50  
51  
52  
53  
54  
55  
56  
57  
58  
59  
60

1  
2  
3  
4  
5  
6 lung cancer mortality,<sup>14</sup> and early smoking initiation is correlated with the duration.  
7  
8  
9 Furthermore, earlier smoking initiation may be associated with greater risk because  
10  
11 early exposure to tobacco products may enhance DNA damage.<sup>16 17</sup> Smoking prevalence  
12  
13  
14 in later ages and amounts of smoking also affect lung cancer mortality. There are  
15  
16 reports for smoking prevalence in several countries, but data for prevalence in the late  
17  
18 19<sup>th</sup> and the first half of the 20<sup>th</sup> century are missing or uncertain. This means that parts  
19  
20  
21 of smoking prevalence are missing for the cohorts whose lung cancer mortality in later  
22  
23  
24 ages has been already observed. In Great Britain, the age specific prevalence before  
25  
26 1948 is unclear. In the surveys from 1948, several age categories for the reported  
27  
28 prevalence, such as 35–59 year olds, were too wide to define birth cohorts. Similar to  
29  
30  
31 the prevalence, the available data for consumption per smoker by age group are  
32  
33  
34 limited.<sup>4</sup> The later cohorts showed larger consumption until about the 1950s birth  
35  
36  
37 cohorts (supplemental figures 1 and 2), but the lung cancer mortality in later ages  
38  
39  
40 around these cohorts has not been observed yet.  
41  
42  
43  
44  
45  
46  
47  
48

### 49 **Unanswered questions and future research**

50  
51  
52 After the mid-1920 cohorts, lung cancer mortality at later ages has not yet been  
53  
54  
55 observed. Future data will reveal the impacts of increasing early initiation in women  
56  
57  
58  
59  
60

1  
2  
3  
4  
5  
6 and the combined impacts of high early initiation and decreasing prevalence in men on  
7  
8  
9 lung cancer mortality at later ages. These are ecological comparisons, and accumulation  
10  
11  
12 of consistent results among countries is desirable. Short-term decreases and increases in  
13  
14  
15 prevalence in young men and women occurred between 1948 and early 1960, and the  
16  
17  
18 troughs were seen in 1955.<sup>4</sup> This pattern of the changes was not seen in older ages.  
19  
20  
21 These troughs in 1955 correspond to the troughs seen in the mid-1930s cohorts in  
22  
23  
24 Figures 1 and 2. Several medical papers about smoking and adverse health effects  
25  
26  
27 published in 1950 are a possible reason of the decrease in prevalence of young people.  
28  
29  
30 Subsequent controversy of the adverse health effects and the increase of sales of filtered  
31  
32  
33 cigarettes are possible reasons of the increase after the mid-1930s cohorts. The  
34  
35  
36 differences in prevalence among these cohorts in women were clearer than those in men,  
37  
38  
39 and correspondingly the troughs in female lung cancer mortality in 60–64 years old or  
40  
41  
42 older were seen. Steep decreases and subsequent unclear decreases were seen in men  
43  
44  
45 too. The mortality in later ages has not yet been observed. In both men and women,  
46  
47  
48 increases were not seen in the prevalence in 50–59 years old between the mid-1930s and  
49  
50  
51 the early-1940s cohorts. A possible reason is that the age at which smokers start to quit  
52  
53  
54 has decreased in later cohorts,<sup>16</sup> so that the prevalence in later ages was lower in later  
55  
56  
57  
58  
59  
60 cohorts.

1  
2  
3  
4  
5  
6 Smoking cessation greatly reduces mortality.<sup>13 18–20</sup> Based on a prospective cohort  
7  
8  
9 study among male British doctors, if people stop smoking before 30 years of age the  
10  
11 risk almost disappears.<sup>18</sup> However, it is unclear that the result can be generalized to  
12  
13 those who started smoking from a very young age. It is also unclear whether mortality  
14  
15 later in life is the same level as in nonsmokers.  
16  
17  
18  
19

20  
21 Tobacco use causes many other adverse health effects. Especially global mortality  
22  
23 from chronic obstructive pulmonary disease (COPD) is high.<sup>1</sup> In Great Britain, the  
24  
25 mortality from COPD showed similar trends with lung cancer mortality (supplemental  
26  
27 figures 3 and 4). In men, the mortality was high in the older cohorts and decreased with  
28  
29 birth year. In women, the mortality increased clearly until the mid-1925s cohorts, and  
30  
31 then decreased. Compared to the lung cancer mortality, increases in mortality with age  
32  
33 were larger over 75–79 years old. More comprehensive studies about adverse health  
34  
35 effects caused by tobacco use are desirable.  
36  
37  
38  
39  
40  
41  
42  
43  
44  
45  
46

#### 47 **Implications for clinicians and policymakers**

48  
49 Monitoring is one of policies against the tobacco epidemic.<sup>1</sup> Because this study  
50  
51 showed the long time lag between smoking initiation and lung cancer mortality within  
52  
53 cohorts compared with possible rapid changes in smoking habits across cohorts,  
54  
55  
56  
57  
58  
59  
60

1  
2  
3  
4  
5  
6 age-specific measures focusing on birth cohorts should be monitored. A repeated  
7  
8 cross-sectional nationwide survey is suited to obtain long-term population data.<sup>21 22</sup> The  
9  
10 results should be reported by age so that birth cohorts can be specified. If age categories  
11  
12 have the same intervals, birth cohorts can be easily specified. In a cohort, cumulative  
13  
14 smoking initiation tends to increase steeply with age, so the initiation age should be  
15  
16 reported by detailed categories.  
17  
18  
19  
20  
21  
22

23 For cohorts born in the 19th century, smoking initiation and lung cancer mortality at  
24  
25 younger ages were unclear even in this study. Lung cancer mortality is used as an  
26  
27 indicator of past smoking habits due to its strong relationship to smoking.<sup>23</sup> Lung cancer  
28  
29 mortality in nonsmokers was less than 1 per 1000 even at 80–84 years of age.<sup>24</sup> Based  
30  
31 on the WHO mortality database,<sup>5</sup> lung cancer mortality in a birth cohort has rarely  
32  
33 exceeded 1 per 1000 at 45–49 years old or 10 per 1000 even at 80–84 years old to date,  
34  
35 with few exceptions. The mortality from lung and pleural cancer in England and Wales  
36  
37 from 1911 was reported.<sup>25</sup> From the late-1860s to the mid-1880s cohorts of men in  
38  
39 England and Wales, the age at which the mortality from lung and pleural cancer  
40  
41 exceeded 1 per 1000 quickly became younger (from >79 to 55–59 years old).  
42  
43  
44 Considering these values, male 1900s cohorts experienced one of the highest lung  
45  
46 cancer mortality and probably one of the worst smoking habit. In the early 1900s, lung  
47  
48  
49  
50  
51  
52  
53  
54  
55  
56  
57  
58  
59  
60

1  
2  
3  
4  
5  
6 cancer was a rare disease.<sup>26</sup> Most men in the 1900s cohorts started smoking in their  
7  
8  
9 teens. In the mid 1970s, over a half century later, the age-standardized male lung cancer  
10  
11 mortality peaked in England and Wales.<sup>26</sup>  
12

13  
14  
15 The great majority of smokers begin to use tobacco before the age of 18 in most  
16  
17 countries.<sup>27</sup> However, most data about smoking initiation have been collected in recent  
18  
19 decades and/or from developed countries. There are large differences in smoking  
20  
21 initiation across birth cohorts in a country and across countries. For example, in Japan,  
22  
23 smoking by minors under 20 years of age has been banned since 1900, and male lung  
24  
25 cancer mortality has been relatively low (exceeded 1 per 1000 at 60–64 years old or  
26  
27 older) in spite of high smoking prevalence. Countries with rapid increases in smoking  
28  
29 initiation in teens should not underestimate the risk in the distant future and should take  
30  
31 swift action to prevent smoking and to promote early cessation.  
32  
33  
34  
35  
36  
37  
38  
39  
40  
41  
42

43  
44 Contributors: IF designed the study, acquired and analyzed the data, and prepared the  
45  
46 manuscript. TF advised on the analysis and interpretation and commented on the drafts  
47  
48 of the manuscript. EY commented on the drafts of the manuscript. All authors  
49  
50 interpreted the data and were involved in drafting the manuscript. IF is the guarantor.  
51  
52

53  
54  
55 Funding: This work was funded by Grant in Aid for Scientific Research (C) [80407931  
56  
57  
58  
59  
60

1  
2  
3  
4  
5  
6 to I.F.] from the Ministry of Education, Culture, Sports, Science, and Technology, Japan.  
7  
8

9 Competing interests: None.  
10

11 Ethical approval: Not required.  
12

13 Data sharing: No additional data available.  
14  
15  
16  
17  
18  
19

## 20 References 21

- 22  
23 1 World Health Organization. WHO report on the global tobacco epidemic, 2008:  
24 The MPOWER package. Geneva: World Health Organization, 2008.  
25  
26  
27  
28 2 Mackay J, Eriksen M. The tobacco atlas. Geneva: World Health Organization,  
29 2002.  
30  
31  
32  
33 3 Yang G, Fan L, Tan J, *et al*. Smoking in China: findings of the 1996 National  
34 Prevalence Survey. *JAMA* 1999; 282: 1247–53.  
35  
36  
37  
38 4 Wald N, Nicolaides-Bouman A, eds. UK smoking statistics, 2nd edn. London and  
39 Oxford: Wolfson Institute of Preventive Medicine and Oxford University Press,  
40 1991.  
41  
42  
43  
44 5 World Health Organization. The detailed data files of the WHO Mortality Database,  
45 2010. <http://www.who.int/whosis/mort/download/en/index.html> (accessed May 7,  
46 2012).  
47  
48  
49  
50  
51  
52  
53  
54  
55  
56  
57  
58  
59  
60

- 1  
2  
3  
4  
5  
6 Forey B, Lee P. Supplement 2, estimating past smoking habits by an indirect  
7  
8  
9 method. An investigation into a method based on recall, with application to Great  
10  
11  
12 Britain. In: Forey B, Hamling J, Hamling J, *et al.*, eds. International smoking  
13  
14 statistics, web edn. Surton: P N Lee Statistics and Computing Ltd., 2002.  
15  
16 <http://www.pnlee.co.uk/ISS.htm> (accessed July 21, 2011).  
17  
18  
19  
20  
21 7 Forey B, Hamling J, Lee P, *et al.*, eds. International smoking statistics. A collection  
22  
23 of historical data from 30 economically developed countries, 2nd edn. Oxford:  
24  
25 Oxford University Press, 2002.  
26  
27  
28  
29 8 Forey B, Hamling J, Hamling J, *et al.*, eds. International smoking statistics, web  
30  
31 edn. A collection of worldwide historical data, United Kingdom. Surton: P N Lee  
32  
33 Statistics and Computing Ltd.; 2009. <http://www.pnlee.co.uk/ISS.htm> (accessed  
34  
35 July 21, 2011).  
36  
37  
38  
39  
40  
41 9 Osler M. Smoking habits in Denmark from 1953 to 1991: a comparative analysis of  
42  
43 results from three nationwide health surveys among adult Danes in 1953–1954,  
44  
45 1986–1987 and 1990–1991. *Int J Epidemiol* 1992; 21: 862–71.  
46  
47  
48  
49  
50 10 Burns DM, Lee L, Shen LZ, *et al.* Cigarette smoking behavior in the United States.  
51  
52 In: Burns DM, Garlfinkel L, Samet J, eds. Smoking and tobacco control monograph  
53  
54 No. 8. Bethesda: Department of Health and Human Services, National Institute of  
55  
56  
57  
58  
59  
60



- 1  
2  
3  
4  
5  
6 Health, National Cancer Institute, 1997, pp. 13–112.  
7  
8  
9 11 Townsend JL. Smoking and lung cancer: a cohort data study of men and women in  
10  
11 England and Wales 1935–70. *J R Stat Soc Ser A Stat Soc* 1978; 141: 95–107.  
12  
13  
14 12 Stevens RG, Moolgavkar SH. A cohort analysis of lung cancer and smoking in  
15  
16 British males. *Am J Epidemiol* 1984; 119: 624–41.  
17  
18  
19  
20 13 IARC. IARC handbooks of cancer prevention, tobacco control, Vol. 11: Reversal of  
21  
22 risk after quitting smoking. Lyon: International Agency for Research on Cancer,  
23  
24 2007.  
25  
26  
27  
28  
29 14 Doll R, Peto R. The causes of cancer: quantitative estimates of avoidable risks of  
30  
31 cancer in the United States today. *J Natl Cancer Inst* 1981; 66: 1191–308.  
32  
33  
34  
35 15 Hirayama T. Life-style and mortality: a large-scale census-based cohort study in  
36  
37 Japan. Basel: Karger, 1990.  
38  
39  
40  
41 16 Wiencke JK, Thurston SW, Kelsey KT, et al. Early age at smoking initiation and  
42  
43 tobacco carcinogen DNA damage in the lung. *J Natl Cancer Inst* 1999; 91: 614–9.  
44  
45  
46  
47 17 Wiencke JK, Kelsey KT. Teen smoking, field cancerization, and a "critical period"  
48  
49 hypothesis for lung cancer susceptibility. *Environ Health Perspect* 2002; 110:  
50  
51 555–8.  
52  
53  
54  
55 18 Peto R, Darby S, Deo H, et al. Smoking, smoking cessation, and lung cancer in the  
56  
57  
58  
59  
60

- 1  
2  
3  
4  
5  
6 UK since 1950: combination of national statistics with two case-control studies.  
7  
8  
9 *BMJ* 2000; 321: 323–9.  
10  
11  
12 19 Doll R, Peto R, Boreham J, *et al.* Mortality in relation to smoking: 50 years'  
13  
14 observations on male British doctors. *BMJ* 2004; 328: 1519–28.  
15  
16  
17  
18 20 Kenfield SA, Stampfer MJ, Rosner BA, *et al.* Smoking and smoking cessation in  
19  
20 relation to mortality in women. *JAMA* 2008; 299: 2037–47  
21  
22  
23  
24 21 Funatogawa I, Funatogawa T, Yano E. Do overweight children necessarily make  
25  
26 overweight adults? Repeated cross sectional annual nationwide survey of Japanese  
27  
28 girls and women over nearly six decades. *BMJ* 2008; 337: a802.  
29  
30  
31  
32 22 Funatogawa I, Funatogawa T, Nakao M, *et al.* Changes in body mass index by birth  
33  
34 cohort in Japanese adults: results from the National Nutrition Survey of Japan  
35  
36 1956–2005. *Int J Epidemiol* 2009; 38: 83–92.  
37  
38  
39  
40  
41 23 Peto R, Lopez AD, Boreham J, *et al.* Mortality from tobacco in developed  
42  
43 countries: indirect estimation from national vital statistics. *Lancet* 1992; 339:  
44  
45 1268–78.  
46  
47  
48  
49  
50 24 Thun MJ, Henley SJ, Burns D, *et al.* Lung cancer death rates in lifelong  
51  
52 nonsmokers. *J Natl Cancer Inst* 2006; 98: 691–9.  
53  
54  
55  
56 25 MacMahon B, Trichopoulos D. *Epidemiology Principles and Methods*, 2nd edn.  
57  
58  
59  
60

1  
2  
3  
4  
5  
6 Boston: Little, Brown Company, 1996.  
7

- 8  
9 26 Quinn M, Babb P, Brock A, *et al.* Cancer trends in England and Wales 1950–1999.

10  
11 Studies on Medical and Population Subjects NO. 66. London: The Stationery Office,  
12  
13  
14  
15 2001.

- 16  
17  
18 27 Shafey O, Dolwick S, Guindon GE, eds. The Tobacco Control Country Profiles,

19  
20  
21 2nd edn. Atlanta: American Cancer Society, Inc., World Health Organization, and

22  
23  
24 International Union Against Cancer, 2003.  
25  
26  
27  
28  
29  
30  
31  
32  
33  
34  
35  
36  
37  
38  
39  
40  
41  
42  
43  
44  
45  
46  
47  
48  
49  
50  
51  
52  
53  
54  
55  
56  
57  
58  
59  
60

1  
2  
3  
4  
5  
6 Figure Legends  
7  
8

9 Fig 1 Changes with birth year in cumulative smoking initiation, prevalence, and lung  
10 cancer mortality by age for British men. Data are from the survey of the Tobacco  
11 Advisory Council (TAC) in 1965–1987 for initiation, the survey of the TAC in  
12 1948–1975 and the General Household Survey in 1972–2005 for prevalence, and the  
13 WHO mortality database for lung cancer mortality in 1950–2009.  
14  
15  
16  
17  
18  
19  
20  
21  
22  
23  
24  
25

26 Fig 2 Changes with birth year in cumulative smoking initiation, prevalence, and lung  
27 cancer mortality by age for British women. Data are from the survey of the Tobacco  
28 Advisory Council (TAC) in 1965–1987 for initiation, the survey of the TAC in  
29 1948–1975 and the General Household Survey in 1972–2005 for prevalence, and the  
30 WHO mortality database for lung cancer mortality in 1950–2009.  
31  
32  
33  
34  
35  
36  
37  
38  
39  
40  
41  
42  
43  
44  
45  
46  
47  
48  
49  
50  
51  
52  
53  
54  
55  
56  
57  
58  
59  
60

Table 1. Cumulative smoking initiation by birth cohort (1898 to 1965) from the survey of the Tobacco Advisory Council, Great Britain, 1948–1987.

| Men          |                           |    |    |    |    |    | Women        |                           |    |    |    |    |    |
|--------------|---------------------------|----|----|----|----|----|--------------|---------------------------|----|----|----|----|----|
| Birth cohort | Cumulative initiation (%) |    |    |    |    |    | Birth cohort | Cumulative initiation (%) |    |    |    |    |    |
|              | Age (years)               |    |    |    |    |    |              | Age (years)               |    |    |    |    |    |
|              | 13                        | 15 | 17 | 19 | 24 | 29 |              | 13                        | 15 | 17 | 19 | 24 | 29 |
| 1900         | -                         | 34 | 58 | 70 | 83 | 86 | 1898         | -                         | 2  | 4  | 7  | 11 | 13 |
| 1906         | -                         | 34 | 58 | 70 | 82 | 84 | 1904         | -                         | 3  | 7  | 10 | 17 | 20 |
| 1913         | 11                        | 32 | 51 | 63 | 76 | 80 | 1911         | 1                         | 6  | 12 | 17 | 26 | 41 |
| 1925         | 12                        | 33 | 51 | 66 | 77 | 80 | 1925         | 2                         | 12 | 24 | 36 | 49 | 53 |
| 1935         | -                         | 23 | 47 | 65 | 74 | -  | 1935         | -                         | 8  | 23 | 37 | 48 | -  |
| 1945         | 9                         | 29 | 51 | 61 | 68 | 67 | 1945         | 3                         | 13 | 32 | 44 | 52 | 52 |
| 1955         | 10                        | 29 | 47 | 55 | 59 | 60 | 1955         | 5                         | 21 | 38 | 47 | 51 | 53 |
| 1965         | 13                        | 32 | 45 | 49 | -  | -  | 1965         | 8                         | 24 | 37 | 44 | -  | -  |

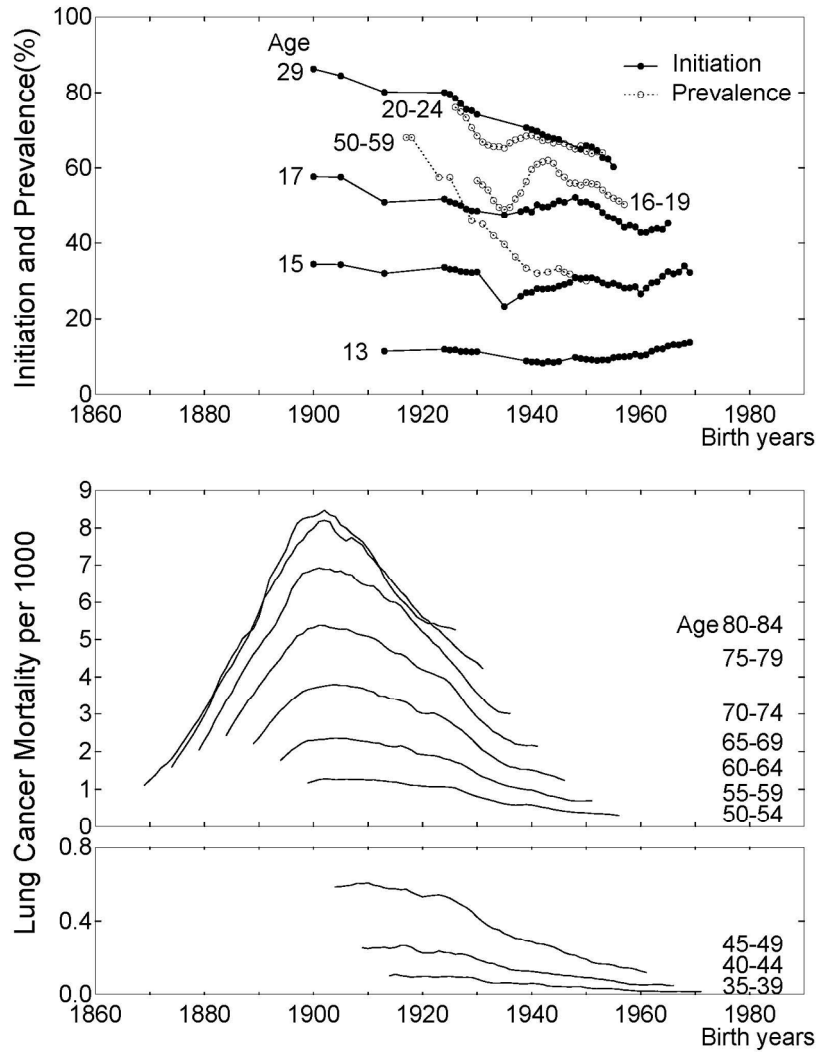

Fig 1 Changes with birth year in cumulative smoking initiation, prevalence, and lung cancer mortality by age for British men. Data are from the survey of the Tobacco Advisory Council (TAC) in 1965–1987 for initiation, the survey of the TAC in 1948–1975 and the General Household Survey in 1972–2005 for prevalence, and the WHO mortality database for lung cancer mortality in 1950–2009.  
140x198mm (300 x 300 DPI)

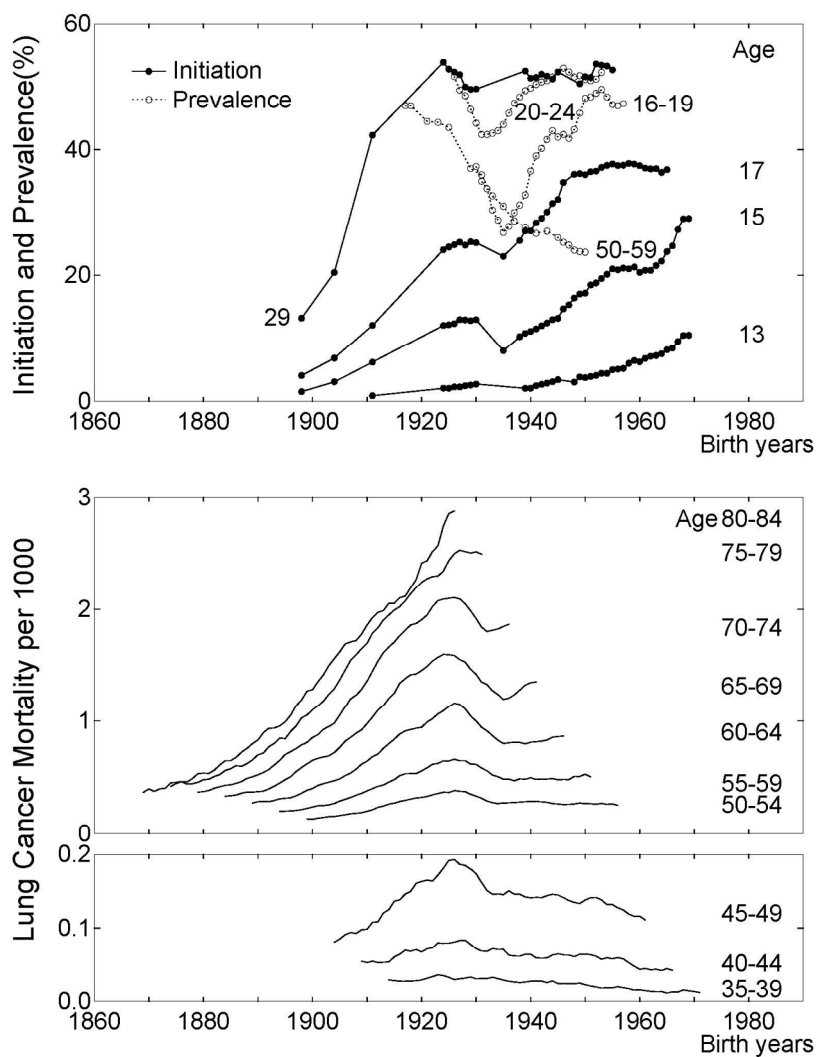

Fig 2 Changes with birth year in cumulative smoking initiation, prevalence, and lung cancer mortality by age for British women. Data are from the survey of the Tobacco Advisory Council (TAC) in 1965–1987 for initiation, the survey of the TAC in 1948–1975 and the General Household Survey in 1972–2005 for prevalence, and the WHO mortality database for lung cancer mortality in 1950–2009.  
140x198mm (300 x 300 DPI)

Supplemental data

Impacts of early smoking initiation: long-term trends of lung cancer mortality and smoking initiation from repeated cross-sectional surveys in Great Britain.

Ikuko Funatogawa, Takashi Funatogawa, Eiji Yano

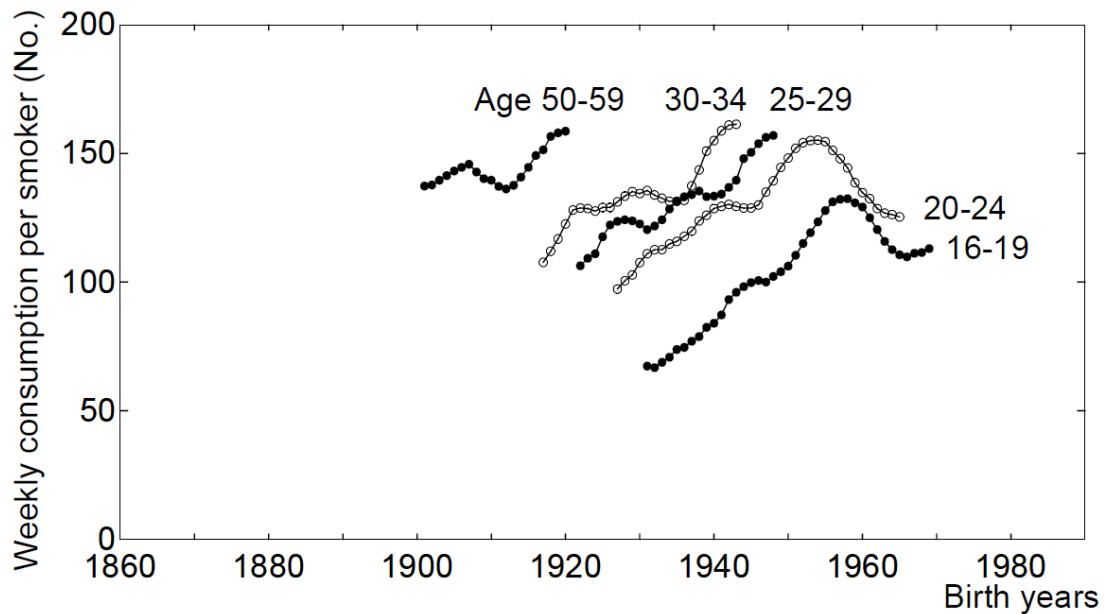

Supplemental Fig 1 Changes with birth year in weekly consumption of manufactured cigarettes per person by age for British men. Data are from the Tobacco Advisory Council in 1946–1987 (Wald and Nicolaides-Bouman, 1991). The estimates are averages of the data in a time window of five years.



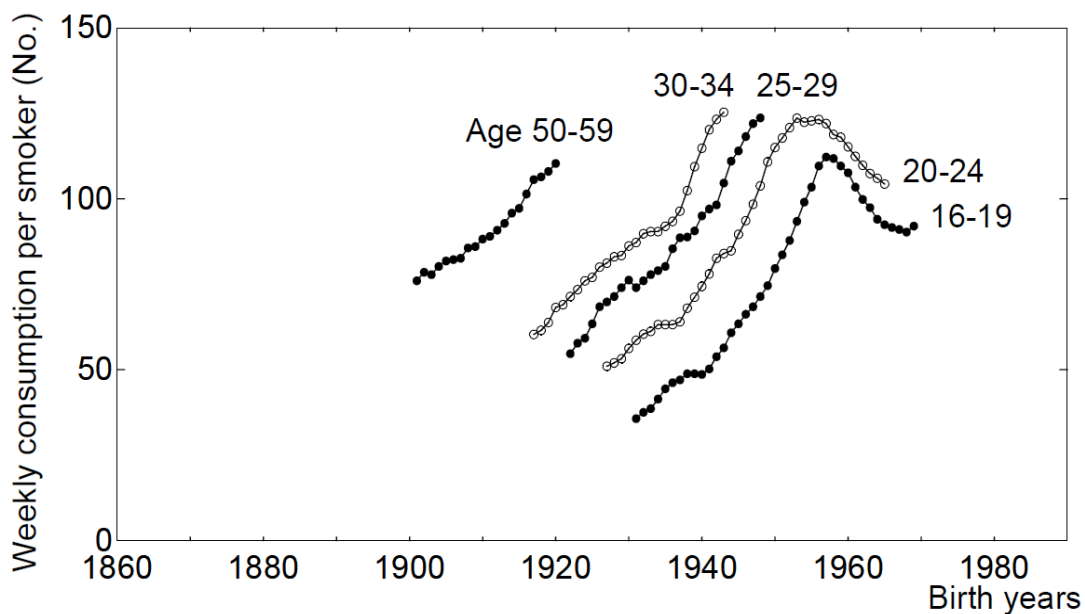

Supplemental Fig 2 Changes with birth year in weekly consumption of manufactured cigarettes per person by age for British women. Data are from the Tobacco Advisory Council in 1946–1987 (Wald and Nicolaides-Bouman, 1991). The estimates are averages of the data in a time window of five years.

Pre-review only

1  
2  
3  
4  
5  
6  
7  
8  
9  
10  
11  
12  
13  
14  
15  
16  
17  
18  
19  
20  
21  
22  
23  
24  
25  
26  
27  
28  
29  
30  
31  
32  
33  
34  
35  
36  
37  
38  
39  
40  
41  
42  
43  
44  
45  
46  
47  
48  
49  
50  
51  
52  
53  
54  
55  
56  
57  
58  
59  
60

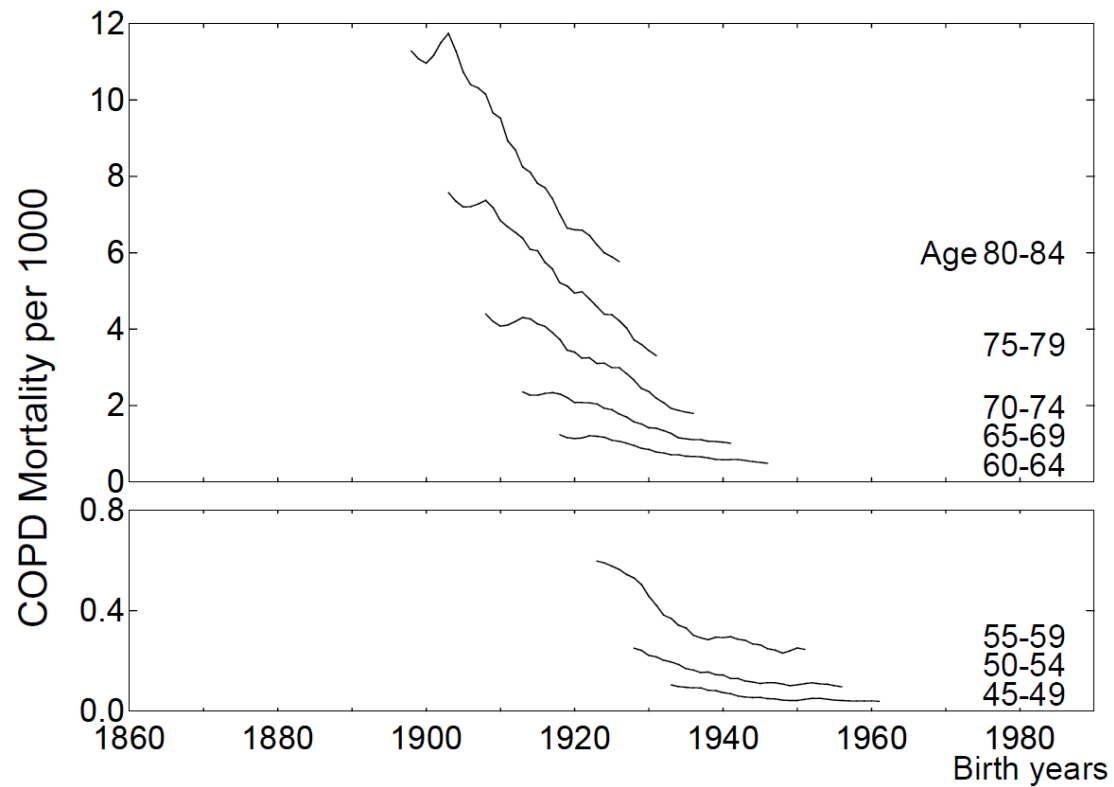

Supplemental Fig 3 Changes with birth year in chronic obstructive pulmonary disease (COPD) mortality by age for British men. Data are from the WHO mortality database in 1979–2009, and COPD is defined by International Classification of Diseases (ICD)-9 codes 490–496 and ICD-10 codes J40–47.

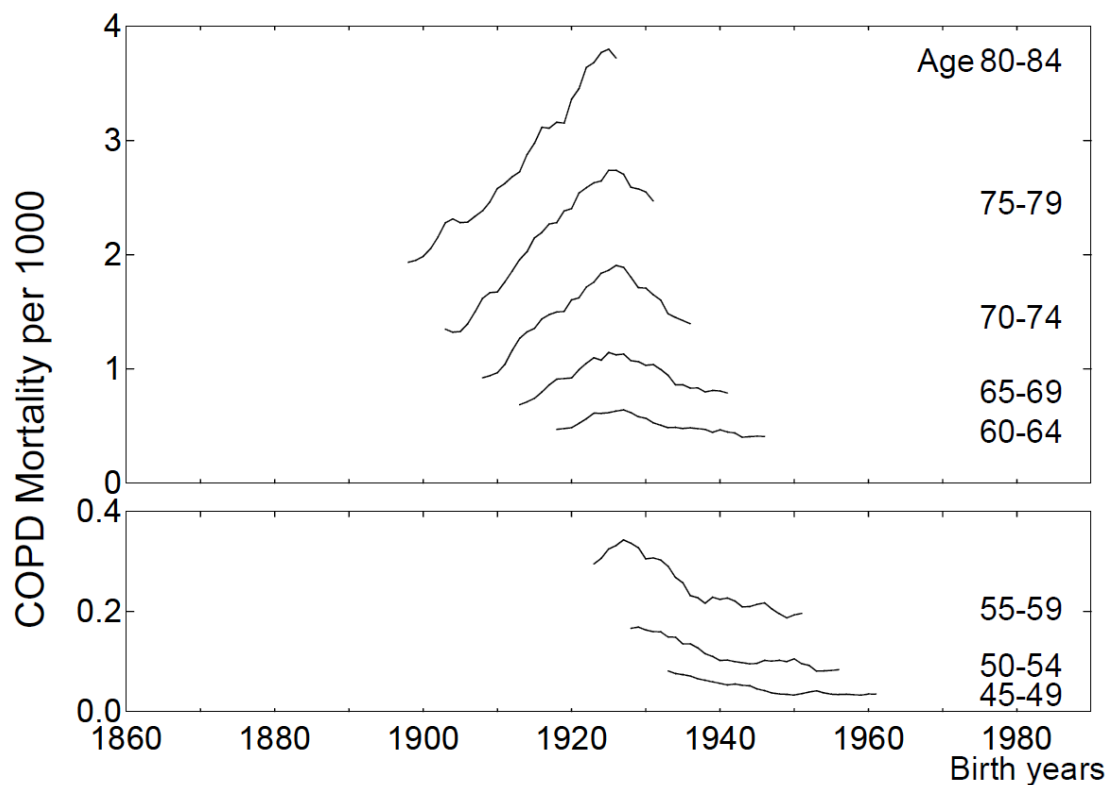

Supplemental Fig 4 Changes with birth year in chronic obstructive pulmonary disease (COPD) mortality by age for British women. Data are from the WHO mortality database in 1979–2009, and COPD is defined by International Classification of Diseases (ICD)-9 codes 490–496 and ICD-10 codes J40–47.

1  
2  
3  
4  
5  
6 **Impacts of early smoking initiation: long-term trends of lung cancer mortality and**  
7  
8  
9 **smoking initiation from repeated cross-sectional surveys in Great Britain**  
10  
11

12  
13  
14  
15 Ikuko Funatogawa, Takashi Funatogawa *statistician*, Eiji Yano

16  
17 Teikyo University Graduate School of Public Health, 2-11-1 Kaga, Itabashi-ku, Tokyo

18  
19  
20 173-8605, Japan Ikuko Funatogawa *associate professor* Chugai Pharmaceutical Co.,

21  
22  
23 Ltd., 2-1-1 Nihonbashi Muromachi, Chuo-ku, Tokyo, 103-8324, Japan Takashi

24  
25  
26 Funatogawa *statistician* Teikyo University Graduate School of Public Health, 2-11-1

27  
28  
29 Kaga, Itabashi-ku, Tokyo 173-8605, Japan Ikuko Funatogawa *professor*

30  
31  
32 Correspondance to: I Funatogawa, Teikyo University Graduate School of Public Health,

33  
34  
35 2-11-1 Kaga, Itabashi-ku, Tokyo 173-8605, Japan ifunatogawa-tky@umin.ac.jp, Tel:

36  
37  
38 +81 3-3964-1211, Fax: +81 3-3964-1058,

39  
40  
41 Running title: Impacts of early smoking initiation

42  
43  
44  
45  
46 Words count for the abstract: 271

47  
48  
49 Words count for the text: ~~2769~~2415

50  
51  
52 The number of figures: 3

53  
54  
55 The number of tables: 1

**ABSTRACT**

**Objective** To show long-term trends of smoking initiation in Great Britain including unanalyzed data and assess the impact of early smoking initiation on the lung cancer mortality in later ages focusing on birth cohorts.

**Design** Reanalysis of repeated cross-sectional surveys conducted thirteen times during 1965–1987.

**Setting** Great Britain.

**Participants** Men and women aged 16 years and over in each survey.

**Primary outcome measures** Smoking initiation for 1898–1969 birth cohorts and lung cancer mortality in 1950–2009.

**Results** In men, 1900–1925 birth cohorts showed high smoking initiation (>32%, >50%, and >80% at 15, 17, and 29 years old, respectively). Correspondingly, the lung cancer mortality in these cohorts exceeded 1 per 1000 at a young age (50–54 years old). In women, smoking initiation increased clearly from the 1898 cohort to the 1925 cohort (2% to 12%, 4% to 24%, and 13% to 54% at 15, 17, and 29 years old, respectively). Correspondingly, the age at which the mortality exceeded 1 per 1000 became younger (75–79 to 60–64 years old). In both men and women, short-term decreases in initiation were seen from the late-1920s cohorts. Correspondingly, lung cancer mortality

1  
2  
3  
4  
5  
6 decreased. In women, initiation increased again after the mid-1930s cohorts, and  
7  
8 mortality increased after they became 60–64 years old.

9  
10  
11 **Conclusions** Clear relationships between smoking initiation and lung cancer mortality  
12  
13 across birth cohorts were observed. Countries with rapid increases in initiation in teens  
14  
15 should not underestimate the risk in the distant future. Because of the long time lags  
16  
17 within cohorts compared with rapid changes in smoking habits across cohorts,  
18  
19 age-specific measures focusing on birth cohorts should be monitored.  
20  
21  
22  
23  
24  
25  
26  
27  
28

29 **Key words:** Birth cohort; cross-sectional study; Great Britain; lung cancer mortality;  
30  
31 smoking; smoking initiation; tobacco  
32  
33  
34  
35  
36  
37

38 **Article focus:**

- 39  
40  
41 • Starting to smoke before 15 years of age greatly increased mortality from lung  
42  
43 cancer and other diseases in cohort studies.  
44  
45  
46 • Available data concerning smoking initiation and subsequent lung cancer mortality  
47  
48 in later age by birth cohort are limited in most countries.  
49  
50  
51  
52  
53  
54

55 **Key messages:**  
56  
57  
58  
59  
60

- The male birth cohorts with high smoking initiation in their teens had high lung cancer mortality, and clear increases in smoking initiation among female cohorts corresponded to the increases in lung cancer mortality.
- Short-term decreases in smoking initiation seen from the late-1920s cohorts corresponded to the decreases in lung cancer mortality.
- In women, smoking initiation increased after the mid-1930s cohorts, and their lung cancer mortality increased after 60–64 years of age, suggesting a long time lag.

**Strength and limitations of this study:**

- The survey from 1965 in Great Britain provides some of the oldest data about smoking initiation, and the repeated survey about initiation and mortality data in enough scale population provide stable estimates in this study.
- The cumulative initiation in this study was based on retrospective questionnaires, and initiation may be underestimated in the elderly.

## Introduction

Smoking causes many adverse health effects including lung cancer, cardiovascular diseases, and respiratory diseases.<sup>1</sup> Despite its known harmful health effects, almost one billion men and 250 million women in the world smoke.<sup>2</sup> The tobacco epidemic has shifted to developing countries.<sup>1</sup> Furthermore, some countries have experienced a rapid increase in smoking initiation among teens.<sup>3</sup> Because there are long time lags between smoking initiation and smoking-attributed mortalities which become apparent only in mid-to-late adulthood, the impacts of early smoking initiation tend to be unclear.

For global public health, it is important to know smoking and subsequent mortality data in several birth cohorts with various smoking habits. However, available data are limited, especially about smoking initiation. In Great Britain, the age of smoking initiation was frequently surveyed between 1965 and 1987,<sup>4</sup> but birth cohorts were not specified. In this paper, we quantitatively estimated long-term trends of smoking initiation and showed the relationship to the lung cancer mortality focusing on birth cohorts.

## Methods

~~We estimated cumulative smoking initiation by birth cohort. We showed changes with~~



~~age in the cumulative smoking initiation, smoking prevalence, and lung cancer mortality for the 1905, 1925, and 1945 birth cohorts; mortality in later ages has been already observed up until the 1925 cohort. We also showed changes with birth year in the three indicators at specified ages.~~

### Smoking Initiation

From 1948 to 1987, the Tobacco Advisory Council conducted an annual survey on smoking habits in Great Britain (England, Wales, and Scotland).<sup>4</sup> Most of these surveys interviewed about 10 000 people. The age of initiation was reported from the thirteen surveys conducted in 1965, 1968, 1971, 1973, 1975, 1978, and annually during 1981–1987 as percentages of people who started smoking any tobacco by sex and age group at the time of survey. Age of initiation was categorized as <14 (1975–1987), 14–15 (1975–1987), <16 (1965–1973), 16–17, 18–19, 20–24, 25–29, >29, ‘Don’t know,’ and ‘Never smoked for as long as a year’ (1965–1987). The percentages of ‘Don’t know’ were <5% in women, <6% in men aged <35 years, and <11% in older men, and we excluded this category in the analysis. For initiation data, age at the time of survey was categorized as 16–19 (1965–1987), 20–24 (1965–1987), 25–34 (1965–1975), 25–29 (1975–1987), 30–34 (1981–1987), 35–59 (1965–1975), 35–49 (1981–1987), 50–64 (1981–1987), >59 (1965–1975), and >64 (1981–1987). We defined the birth year

1  
2  
3  
4  
5  
6 using the median age or next larger integer; thus, people aged 16–19 years in 198748  
7  
8  
9 were defined as the 1930–1969 birth cohort (198748 minus 18). For the categories >59  
10  
11 and >64, the median age was estimated from population statistics.<sup>5</sup> We excluded the  
12  
13 data for 35–59 years of age because the range was too wide. We calculated the  
14  
15 cumulative proportion of people who began smoking by specified ages. Then, for each  
16  
17 birth cohort, except cohorts that had no observations, we estimated cumulative initiation  
18  
19 by taking an average of the data in a time window of five years as a smoothing  
20  
21 method from the birth cohorts within two years. For example, cumulative initiation of  
22  
23 the 1967 birth cohort is estimated from the average of the data for the 1965–1969 birth  
24  
25 cohorts. In the age categories of >59 or >64, cumulative initiation and birth years were  
26  
27  
28  
29  
30  
31  
32  
33  
34  
35  
36  
37  
38  
39  
40  
41  
42  
43  
44  
45  
46  
47  
48  
49  
50  
51  
52  
53  
54  
55  
56  
57  
58  
59  
60

### Smoking Prevalence

~~To show changes in prevalence with age for the 1905, 1925, and 1945 birth cohorts, we used data from the 1984–1985 Health and Lifestyle Study in Great Britain.<sup>6</sup> Based on the questions about the age of starting and quitting smoking, prevalence by birth cohort and calendar year were reported.<sup>6</sup> The sample sizes by birth cohort and sex ranged from~~

~~214 to 993. We defined the 1900–1909 birth cohorts in 1930 as the 1905 birth cohort and as 25 years of age.~~

To show changes in age-specific prevalence with birth year, we used data from the annual survey of the Tobacco Advisory Council in 1948–1975 and the General Household Survey in 1972–2005 conducted in Great Britain.<sup>7 8</sup> Most of the surveys of the Tobacco Advisory Council interviewed about 10 000 people, and the General Household Survey interviewed 12 000 households or more. We used prevalence reported annually for 16–19 and 20–24 year olds in 1948–1975, and 50–59 year olds for 18 years during 1972–2005. We used prevalence of all tobacco products except women in the survey of the Tobacco Advisory Council. For them, we used prevalence of manufactured cigarettes, as few women smoked products other than cigarettes and the prevalence of all tobacco products were not reported for several years. The prevalence included occasional smokers. In the same manner as the smoking initiation, we defined birth year and estimated the average prevalence. These surveys cover the 1917–1987 cohorts. ~~The smoking prevalence in 50–59 year olds for the 1945 cohort was also used to show changes with age.~~

### **Lung cancer mortality**

1  
2  
3  
4  
5  
6 We calculated annual lung cancer mortality rates between 1950 and 2009 in Great  
7  
8  
9 Britain based on data in England and Wales and data in Scotland from the WHO  
10  
11 Mortality Database.<sup>5</sup> We used mortality categorized as five-year age groups from 35–39  
12  
13 to 80–84 years of age. We defined participants who were 80–84 years old in 1950 as the  
14  
15 1868 birth cohort. For each birth cohort, we took an average of the data from the birth  
16  
17 cohorts within one year. These data cover the 1868–1972 birth cohorts.  
18  
19  
20  
21

### 22 23 24 25 26 Statistical Analysis

27  
28  
29 We showed changes with birth year in the cumulative smoking initiation, smoking  
30  
31 prevalence, and lung cancer mortality at specified ages. Trends including peaks and  
32  
33 troughs in these indicators were assessed. Lung cancer mortality in later ages has been  
34  
35 already observed up until the mid-1920s cohorts.  
36  
37  
38  
39  
40  
41  
42  
43

### 44 **Results**

45  
46 Table 1 shows cumulative smoking initiation by sex and birth cohort. Men in the 1900  
47  
48 cohort, the oldest cohort with available data, showed the highest initiation, and the  
49  
50 1900–1925 cohorts showed high initiation (>32%, >50%, and >80% at 15, 17, and 29  
51  
52 years old, respectively). Generally, from the 1900 cohort to the 1955 cohort, initiation  
53  
54  
55  
56  
57  
58  
59  
60

1  
2  
3  
4  
5  
6 decreased successively with birth year except for the 15-year-old or younger age group.

7  
8  
9 The oldest cohort for women, the 1898 cohort, showed the lowest initiation. Initiation  
10  
11 increased clearly from the 1898 cohort to the 1925 cohort (2% to 12%, 4% to 24%, and  
12  
13 13% to 54% at 15, 17, and 29 years old, respectively). From the 1925 cohort to the 1955  
14  
15 cohort, initiation was stable at 24 and 29 years of age but increased at younger ages.  
16  
17  
18

19  
20  
21 (Table 1 here)

22  
23 ~~—Figure 1 shows changes with age in cumulative smoking initiation, prevalence, and~~  
24 ~~lung cancer mortality for the 1905, 1925, and 1945 birth cohorts by sex. Smoking habits~~  
25 ~~differed largely among the cohorts, and the subsequent mortality ranged widely. A clear~~  
26 ~~relationship between smoking and lung cancer mortality was seen regardless of sex.~~  
27 ~~Among the six cohorts, the 1905 female cohort showed the lowest initiation, prevalence,~~  
28 ~~and mortality. In contrast, the corresponding male cohort showed the highest initiation,~~  
29 ~~prevalence, and mortality. In the 1925 female cohort, the initiation, prevalence, and~~  
30 ~~mortality increased largely compared to the 1905 female cohort. Although the initiation~~  
31 ~~was higher in the 1945 female cohort compared with that in the 1925 female cohort, the~~  
32 ~~prevalence at later ages decreased to the level of 1905 female cohort, indicating that~~  
33 ~~these women stopped smoking. The mortality was between those of the 1905 and 1925~~  
34 ~~female cohorts to date. In men, initiation, prevalence, and mortality decreased~~  
35  
36  
37  
38  
39  
40  
41  
42  
43  
44  
45  
46  
47  
48  
49  
50  
51  
52  
53  
54  
55  
56  
57  
58  
59  
60

1  
2  
3  
4  
5  
6 ~~successively. Compared with the 1925 female cohort, the 1945 male cohort showed~~  
7  
8  
9 ~~much higher initiation but lower prevalence at later ages, and higher mortality to date.~~

10  
11  
12 (Figure 1 here)

13  
14  
15 Figures 12 and 23 show changes with birth year in cumulative smoking initiation,  
16  
17 prevalence, and lung cancer mortality by age for men and women, respectively. In men,  
18  
19 mortality increased rapidly from the 1870 cohort to the 1905 cohort. In the 1870 cohort,  
20  
21 mortality was already over 1 per 1000 in the 80–84 age group. In the 1900–1925  
22  
23 cohorts, which showed the high smoking initiation, the mortality exceeded 1 per 1000 at  
24  
25 younger age (50–54 years old). After the early-1900s cohorts, the mortality decreased,  
26  
27 and especially rapid decreases were seen between the late-1920s and the mid-1930s  
28  
29 cohorts. Correspondingly, the short-term troughs in initiation and prevalence [in 16–19](#)  
30  
31 [and 20–24 years old](#) were seen in the mid-1930s cohorts.

32  
33  
34  
35  
36  
37  
38  
39  
40  
41 (Figure 12 here)

42  
43  
44 In women, mortality increased from the 1870 cohort to the mid-1920s cohorts. Up  
45  
46 until the early-1890s cohorts, the mortality was below 1 per 1000 even in 80–84 year  
47  
48 olds. From the 1898 cohort to the 1925 cohort, smoking initiation clearly increased  
49  
50 (Table 1), and the age at which the mortality exceeded 1 per 1000 became younger  
51  
52 (75–79 to 60–64 years old). Between the late-1920s cohorts and the mid-1930s cohorts  
53  
54  
55  
56  
57  
58  
59  
60

1  
2  
3  
4  
5  
6 the mortality decreased. Correspondingly, decreases in initiation and prevalence were  
7  
8  
9 seen. After the mid-1930s cohort, initiation and prevalence in 16–19 and 20–24 years  
10  
11 old increased again, but prevalence in 50–59 years old did not increase. The mortality  
12  
13  
14 increased after they became 60–64 years old.  
15

16  
17  
18 (Figure 23 here)  
19  
20  
21  
22

## 23 Discussion

24  
25  
26 In this paper, we quantitatively showed the long-term trends of smoking initiation in  
27  
28 Great Britain focusing on birth cohorts. Clear relationships were seen between smoking  
29  
30 initiation and lung cancer mortality. The male cohorts with high smoking initiation in  
31  
32 their teens had high lung cancer mortality. Clear increases in smoking initiation among  
33  
34 female cohorts corresponded to the increases in lung cancer mortality. In women,  
35  
36 smoking initiation increased after the mid-1930s cohorts, and their lung cancer  
37  
38 mortality increased after 60–64 years of age. This suggests a long time lag between  
39  
40 smoking initiation and lung cancer mortality.  
41  
42  
43  
44  
45  
46  
47  
48  
49  
50  
51

## 52 Strength and weakness of the study

53  
54  
55 The age of smoking initiation was surveyed in 1954 in Denmark,<sup>9</sup> in 1970 in the  
56  
57  
58  
59  
60

1  
2  
3  
4  
5  
6 U.S.,<sup>10</sup> and in some other countries. The survey in 1965 in Great Britain provides some  
7  
8  
9 of the oldest data about smoking initiation, and the repeated survey about initiation and  
10  
11 mortality data in enough scale population provide stable estimates in this study. The  
12  
13 cumulative initiation in this study was based on retrospective questionnaires. In the  
14  
15 elderly, cumulative initiation may be underestimated because people who started  
16  
17 smoking earlier tended to die younger. Elderly may also report older age of initiation  
18  
19 than their actual age of initiation. However, thesethis biases would not change the  
20  
21 finding that cohorts with high initiation showed high lung cancer mortality because  
22  
23 elderly men showed the highest initiation. Considering the large differences in  
24  
25 cumulative initiation across cohorts of elderly women, the possible underestimation  
26  
27 would not change the finding that the clear increases of initiation corresponded with the  
28  
29 increases in lung cancer mortality. Since 1908, the sale of tobacco to children under the  
30  
31 age of 16 has been prohibited. The age rose to 18 in 2007. The cumulative initiation at  
32  
33 the age of 15 was about 30% other than around the mid-1930s birth cohorts in men, but  
34  
35 it changed largely in women. These suggest that social norms about the smoking were  
36  
37 not changed largely in male children, but these were changed in female children.  
38  
39 Females under tight social norms might report older age of initiation than their actual  
40  
41 age of initiation. However, considering the high cumulative initiation at the age of 24  
42  
43  
44  
45  
46  
47  
48  
49  
50  
51  
52  
53  
54  
55  
56  
57  
58  
59  
60



(about 50%), the social norm would not be so strict compared to some other countries and this possible bias would not change the findings.

### **Strength and weakness in relation to other studies**

Relationships between smoking prevalence in adults and lung cancer mortality have been analyzed by various authors.<sup>11-13</sup> However, smoking initiation and lung cancer mortality in later life by birth cohort have rarely been presented together regardless of its importance. To interpret the lung cancer mortality of a particular age, we ideally need to know not only smoking in the recent past but also smoking in their teens or twenties.<sup>14</sup> Starting to smoke before 15 years of age greatly increases mortality from lung cancer and other diseases.<sup>14 15</sup> The duration of smoking is a strong determinant of lung cancer mortality,<sup>14</sup> and early smoking initiation is correlated with the duration. Furthermore, earlier smoking initiation may be associated with greater risk because early exposure to tobacco products may enhance DNA damage.<sup>16 17</sup> Smoking prevalence in later ages and amounts of smoking also affect lung cancer mortality. There are reports for smoking prevalence in several countries, but data for prevalence in the late 19<sup>th</sup> and the first half of the 20<sup>th</sup> century are missing or uncertain. This means that parts of smoking prevalence are missing for the cohorts whose lung cancer mortality in later

1  
2  
3  
4  
5  
6 ages has been already observed. In Great Britain, the age specific prevalence before  
7  
8  
9 1948 is unclear. In the surveys from 1948, several age categories for the reported  
10  
11  
12 prevalence, such as 35–59 year olds, were too wide to define birth cohorts. Similar to  
13  
14  
15 the prevalence, the available data for consumption per smoker by age group are  
16  
17  
18 limited.<sup>4</sup> The later cohorts showed larger consumption until about the 1950s birth  
19  
20  
21 cohorts (supplemental figures 1 and 2), but the lung cancer mortality in later ages  
22  
23  
24 around these cohorts has not been observed yet.

### 25 26 27 28 29 **Unanswered questions and future research**

30  
31  
32 After the mid-1920 cohorts, lung cancer mortality at later ages has not yet been  
33  
34  
35 observed. Future data will reveal the impacts of increasing early initiation in women  
36  
37  
38 and the combined impacts of high early initiation and decreasing prevalence in men on  
39  
40  
41 lung cancer mortality at later ages. These are ecological comparisons, and accumulation  
42  
43  
44 of consistent results among countries is desirable. Short-term decreases and increases in  
45  
46  
47 prevalence in young men and women occurred between 1948 and early 1960, and the  
48  
49  
50 troughs were seen in 1955.<sup>4</sup> This pattern of the changes was not seen in older ages.  
51  
52  
53 These troughs in 1955 correspond to the troughs seen in the mid-1930s cohorts in  
54  
55  
56 Figures 1 and 2. Several medical papers about smoking and adverse health effects  
57  
58  
59  
60

1  
2  
3  
4  
5  
6 published in 1950 are a possible reason of the decrease in prevalence of young people.  
7  
8  
9 Subsequent controversy of the adverse health effects and the increase of sales of filtered  
10  
11 cigarettes are possible reasons of the increase after the mid-1930s cohorts. The  
12  
13 differences in prevalence among these cohorts in women were clearer than those in men,  
14  
15 and correspondingly the troughs in female lung cancer mortality in 60–64 years old or  
16  
17 older were seen. Steep decreases and subsequent unclear decreases were seen in men  
18  
19 too. The mortality in later ages has not yet been observed. In both men and women,  
20  
21 increases were not seen in the prevalence in 50–59 years old between the mid-1930s and  
22  
23 the early-1940s cohorts. A possible reason is that the age at which smokers start to quit  
24  
25 has decreased in later cohorts,<sup>16</sup> so that the prevalence in later ages was lower in later  
26  
27 cohorts.  
28  
29  
30  
31  
32  
33  
34  
35  
36

37  
38 Smoking cessation greatly reduces mortality.<sup>13 18–20</sup> Based on a prospective cohort  
39  
40 study among male British doctors, if people stop smoking before 30 years of age the  
41  
42 risk almost disappears.<sup>18</sup> However, it is unclear that the result can be generalized to  
43  
44 those who started smoking from a very young age. It is also unclear whether mortality  
45  
46 later in life is the same level as in nonsmokers.  
47  
48  
49  
50

51  
52 Tobacco use causes many other adverse health effects. Especially global mortality  
53  
54 from chronic obstructive pulmonary disease (COPD) is high.<sup>1</sup> In Great Britain, the  
55  
56  
57  
58  
59  
60

1  
2  
3  
4  
5  
6 mortality from COPD showed similar trends with lung cancer mortality (supplemental  
7  
8  
9 figures 3 and 4). In men, the mortality was high in the older cohorts and decreased with  
10  
11 birth year. In women, the mortality increased clearly until the mid-1925s cohorts, and  
12  
13 then decreased. Compared to the lung cancer mortality, increases in mortality with age  
14  
15 were larger over 75–79 years old. More comprehensive studies about adverse health  
16  
17 effects caused by tobacco use are desirable.  
18  
19  
20  
21  
22  
23  
24  
25  
26

### 27 **Implications for clinicians and policymakers**

28  
29 Monitoring is one of policies against the tobacco epidemic.<sup>1</sup> Because this study  
30  
31 showed the long time lag between smoking initiation and lung cancer mortality within  
32  
33 cohorts compared with possible rapid changes in smoking habits across cohorts,  
34  
35 age-specific measures focusing on birth cohorts should be monitored. A repeated  
36  
37 cross-sectional nationwide survey is suited to obtain long-term population data.<sup>21 22</sup> The  
38  
39 results should be reported by age so that birth cohorts can be specified. If age categories  
40  
41 have the same intervals, birth cohorts can be easily specified. In a cohort, cumulative  
42  
43 smoking initiation tends to increase steeply with age, so the initiation age should be  
44  
45 reported by detailed categories.  
46  
47  
48  
49  
50  
51  
52  
53  
54

55 For cohorts born in the 19th century, smoking initiation and lung cancer mortality at  
56  
57  
58  
59  
60

1  
2  
3  
4  
5  
6 younger ages were unclear even in this study. Lung cancer mortality is used as an  
7  
8 indicator of past smoking habits due to its strong relationship to smoking.<sup>23</sup> Lung cancer  
9  
10 mortality in nonsmokers was less than 1 per 1000 even at 80–84 years of age.<sup>24</sup> Based  
11  
12 on the WHO mortality database,<sup>5</sup> lung cancer mortality in a birth cohort has rarely  
13  
14 exceeded 1 per 1000 at 45–49 years old or 10 per 1000 even at 80–84 years old to date,  
15  
16 with few exceptions. The mortality from lung and pleural cancer in England and Wales  
17  
18 from 1911 was reported.<sup>25</sup> From the late-1860s to the mid-1880s cohorts of men in  
19  
20 England and Wales, the age at which the mortality from lung and pleural cancer  
21  
22 exceeded 1 per 1000 quickly became younger (from >79 to 55–59 years old).  
23  
24 Considering these values, male 1900s cohorts experienced one of the highest lung  
25  
26 cancer mortality and probably one of the worst smoking habit. In the early 1900s, lung  
27  
28 cancer was a rare disease.<sup>26</sup> Most men in the 1900s cohorts started smoking in their  
29  
30 teens. In the mid 1970s, over a half century later, the age-standardized male lung cancer  
31  
32 mortality peaked in England and Wales.<sup>26</sup>

33  
34  
35  
36  
37  
38  
39  
40  
41  
42  
43  
44  
45  
46 The great majority of smokers begin to use tobacco before the age of 18 in most  
47  
48 countries.<sup>27</sup> However, most data about smoking initiation have been collected in recent  
49  
50 decades and/or from developed countries. There are large differences in smoking  
51  
52 initiation across birth cohorts in a country and across countries. For example, in Japan,  
53  
54  
55  
56  
57  
58  
59  
60

1  
2  
3  
4  
5  
6 smoking by minors under 20 years of age has been banned since 1900, and male lung  
7  
8  
9 cancer mortality has been relatively low (exceeded 1 per 1000 at 60–64 years old or  
10  
11  
12 older) in spite of high smoking prevalence. Countries with rapid increases in smoking  
13  
14  
15 initiation in teens should not underestimate the risk in the distant future and should take  
16  
17  
18 swift action to prevent smoking and to promote early cessation.  
19

20  
21  
22  
23 Contributors: IF designed the study, acquired and analyzed the data, and prepared the  
24  
25  
26 manuscript. TF advised on the analysis and interpretation and commented on the drafts  
27  
28  
29 of the manuscript. EY commented on the drafts of the manuscript. All authors  
30  
31  
32 interpreted the data and were involved in drafting the manuscript. IF is the guarantor.  
33

34  
35 Funding: This work was funded by Grant in Aid for Scientific Research (C) [80407931  
36  
37  
38 to I.F.] from the Ministry of Education, Culture, Sports, Science, and Technology, Japan.  
39

40  
41 Competing interests: None.  
42

43  
44 Ethical approval: Not required.  
45

46  
47 Data sharing: No additional data available.  
48

## 49 50 51 52 **References**

53  
54  
55 1 World Health Organization. WHO report on the global tobacco epidemic, 2008:  
56  
57  
58  
59  
60

- 1  
2  
3  
4  
5  
6 The MPOWER package. Geneva: World Health Organization, 2008.  
7  
8  
9 2 Mackay J, Eriksen M. The tobacco atlas. Geneva: World Health Organization,  
10  
11 2002.  
12  
13  
14 3 Yang G, Fan L, Tan J, *et al.* Smoking in China: findings of the 1996 National  
15  
16 Prevalence Survey. *JAMA* 1999; 282: 1247–53.  
17  
18  
19  
20 4 Wald N, Nicolaides-Bouman A, eds. UK smoking statistics, 2nd edn. London and  
21  
22 Oxford: Wolfson Institute of Preventive Medicine and Oxford University Press,  
23  
24 1991.  
25  
26  
27  
28 5 World Health Organization. The detailed data files of the WHO Mortality Database,  
29  
30 2010. <http://www.who.int/whosis/mort/download/en/index.html> (accessed May 7,  
31  
32 2012).  
33  
34  
35  
36  
37 6 Forey B, Lee P. Supplement 2, estimating past smoking habits by an indirect  
38  
39 method. An investigation into a method based on recall, with application to Great  
40  
41 Britain. In: Forey B, Hamling J, Hamling J, *et al.*, eds. International smoking  
42  
43 statistics, web edn. Surton: P N Lee Statistics and Computing Ltd., 2002.  
44  
45  
46  
47 <http://www.pnlee.co.uk/ISS.htm> (accessed July 21, 2011).  
48  
49  
50  
51 7 Forey B, Hamling J, Lee P, *et al.*, eds. International smoking statistics. A collection  
52  
53 of historical data from 30 economically developed countries, 2nd edn. Oxford:  
54  
55  
56  
57  
58  
59  
60

- Oxford University Press, 2002.
- 8 Forey B, Hamling J, Hamling J, *et al.*, eds. International smoking statistics, web  
9 edn. A collection of worldwide historical data, United Kingdom. Surton: P N Lee  
10 Statistics and Computing Ltd.; 2009. <http://www.pnlee.co.uk/ISS.htm> (accessed  
11 July 21, 2011).  
12  
13  
14  
15  
16  
17  
18  
19  
20  
21 9 Osler M. Smoking habits in Denmark from 1953 to 1991: a comparative analysis of  
22 results from three nationwide health surveys among adult Danes in 1953–1954,  
23 1986–1987 and 1990–1991. *Int J Epidemiol* 1992; 21: 862–71.  
24  
25  
26  
27  
28  
29 10 Burns DM, Lee L, Shen LZ, *et al.* Cigarette smoking behavior in the United States.  
30 In: Burns DM, Garlfinkel L, Samet J, eds. Smoking and tobacco control monograph  
31 No. 8. Bethesda: Department of Health and Human Services, National Institute of  
32 Health, National Cancer Institute, 1997, pp. 13–112.  
33  
34  
35  
36  
37  
38  
39  
40  
41 11 Townsend JL. Smoking and lung cancer: a cohort data study of men and women in  
42 England and Wales 1935–70. *J R Stat Soc Ser A Stat Soc* 1978; 141: 95–107.  
43  
44  
45  
46  
47 12 Stevens RG, Moolgavkar SH. A cohort analysis of lung cancer and smoking in  
48 British males. *Am J Epidemiol* 1984; 119: 624–41.  
49  
50  
51  
52 13 IARC. IARC handbooks of cancer prevention, tobacco control, Vol. 11: Reversal of  
53 risk after quitting smoking. Lyon: International Agency for Research on Cancer,  
54  
55  
56  
57  
58  
59  
60



- 2007.
- 14 Doll R, Peto R. The causes of cancer: quantitative estimates of avoidable risks of cancer in the United States today. *J Natl Cancer Inst* 1981; 66: 1191–308.
- 15 Hirayama T. Life-style and mortality: a large-scale census-based cohort study in Japan. Basel: Karger, 1990.
- 16 Wiencke JK, Thurston SW, Kelsey KT, et al. Early age at smoking initiation and tobacco carcinogen DNA damage in the lung. *J Natl Cancer Inst* 1999; 91: 614–9.
- 17 Wiencke JK, Kelsey KT. Teen smoking, field cancerization, and a "critical period" hypothesis for lung cancer susceptibility. *Environ Health Perspect* 2002; 110: 555–8.
- 18 Peto R, Darby S, Deo H, et al. Smoking, smoking cessation, and lung cancer in the UK since 1950: combination of national statistics with two case-control studies. *BMJ* 2000; 321: 323–9.
- 19 Doll R, Peto R, Boreham J, et al. Mortality in relation to smoking: 50 years' observations on male British doctors. *BMJ* 2004; 328: 1519–28.
- 20 Kenfield SA, Stampfer MJ, Rosner BA, et al. Smoking and smoking cessation in relation to mortality in women. *JAMA* 2008; 299: 2037–47
- 21 Funatogawa I, Funatogawa T, Yano E. Do overweight children necessarily make

- 1  
2  
3  
4  
5  
6 overweight adults? Repeated cross sectional annual nationwide survey of Japanese  
7  
8  
9 girls and women over nearly six decades. *BMJ* 2008; 337: a802.  
10  
11  
12 22 Funatogawa I, Funatogawa T, Nakao M, *et al.* Changes in body mass index by birth  
13  
14 cohort in Japanese adults: results from the National Nutrition Survey of Japan  
15  
16 1956–2005. *Int J Epidemiol* 2009; 38: 83–92.  
17  
18  
19  
20 23 Peto R, Lopez AD, Boreham J, *et al.* Mortality from tobacco in developed  
21  
22 countries: indirect estimation from national vital statistics. *Lancet* 1992; 339:  
23  
24 1268–78.  
25  
26  
27  
28  
29 24 Thun MJ, Henley SJ, Burns D, *et al.* Lung cancer death rates in lifelong  
30  
31 nonsmokers. *J Natl Cancer Inst* 2006; 98: 691–9.  
32  
33  
34  
35 25 MacMahon B, Trichopoulos D. *Epidemiology Principles and Methods*, 2nd edn.  
36  
37 Boston: Little, Brown Company, 1996.  
38  
39  
40  
41 26 Quinn M, Babb P, Brock A, *et al.* *Cancer trends in England and Wales 1950–1999.*  
42  
43 *Studies on Medical and Population Subjects NO. 66.* London: The Stationery Office,  
44  
45 2001.  
46  
47  
48  
49 27 Shafey O, Dolwick S, Guindon GE, eds. *The Tobacco Control Country Profiles,*  
50  
51 2nd edn. Atlanta: American Cancer Society, Inc., World Health Organization, and  
52  
53 International Union Against Cancer, 2003.  
54  
55  
56  
57  
58  
59  
60

## Figure Legends

~~Fig 1 Changes with age in cumulative smoking initiation, prevalence, and lung cancer mortality for the 1905, 1925 and 1945 birth cohorts of British men and women. Data are from the survey of the Tobacco Advisory Council in 1965–1987 for initiation, the Health and Lifestyle Study in 1984–1985 and the General Household Survey in 1998–2002 for prevalence, and the WHO mortality database for lung cancer mortality in 1950–2009. Initiation for people 65 years old or over in 1971–1975 was used for the 1905 birth cohort.~~

Fig ~~12~~ Changes with birth year in cumulative smoking initiation, prevalence, and lung cancer mortality by age for British men. Data are from the survey of the Tobacco Advisory Council (TAC) in 1965–1987 for initiation, the survey of the TAC in 1948–1975 and the General Household Survey in 1972–2005 for prevalence, and the WHO mortality database for lung cancer mortality in 1950–2009.

Fig ~~23~~ Changes with birth year in cumulative smoking initiation, prevalence, and lung cancer mortality by age for British women. Data are from the survey of the Tobacco Advisory Council (TAC) in 1965–1987 for initiation, the survey of the TAC in

1  
2  
3  
4  
5  
6  
7  
8  
9  
10  
11  
12  
13  
14  
15  
16  
17  
18  
19  
20  
21  
22  
23  
24  
25  
26  
27  
28  
29  
30  
31  
32  
33  
34  
35  
36  
37  
38  
39  
40  
41  
42  
43  
44  
45  
46  
47  
48  
49  
50  
51  
52  
53  
54  
55  
56  
57  
58  
59  
60

1948–1975 and the General Household Survey in 1972–2005 for prevalence, and the WHO mortality database for lung cancer mortality in 1950–2009.

For peer review only
